# Supplementary material for: Machine Learning in Stream/River Water Temperature Modelling: a review and metrics for evaluation
Source: Copernicus journal article supplement (doi:10.5194/hess-2024-256), 2024-08-26
Supplement: Supplementary file 1 [file hess-2024-256-supplement.pdf]

## Supplemental Materials for:

# Machine Learning in Stream/River Water Temperature Modelling: a review and metrics for evaluation

5

Claudia R. Corona<sup>1</sup>, Terri S. Hogue<sup>1,2</sup>

<sup>1</sup>Department of Civil and Environmental Engineering, Colorado School of Mines, Golden, 80401, United States

<sup>2</sup>Hydrologic Science and Engineering Program, Colorado School of Mines, Golden, 80401, United States

*Correspondence to:* Claudia R. Corona (Claudia.corona@mines.edu)

10

For this section, we organize the studies discussed and relevant information in Tables S1 and S2. Table S1 includes the 54 publications from which performance metrics were obtained. Table S1 includes the following information (as provided by the study): period considered, region examined, temporal resolution of SWT, spatial scale of study, hydrometeorological parameters used for modeling, and evaluation metrics used to assess model performance. References are in chronological order by year, by year of publication acceptance. For studies that detailed more than 5-6 hydrometeorological parameters/forcings, the number of variables is stated on Table S1 but only a partial list is included. With regards to the spatial scale stated in Table S1, the first subsection discusses studies that focused on the local/watershed scale, and the second subsection focuses on regional/CONUS point-scale studies. Table S2 lists the data analysis techniques and/or ML algorithms used, as well as the training/validation/testing percentages/time periods as reported by the study.

25

30

**Supplemental Materials, Table 1. Spatial/temporal data and parameters used by SWT studies, as reported. SWT = stream water temperature, ET = Evapotranspiration, PPT = Precipitation, AT = air temperature, DO = dissolved oxygen, DOY = day-of-year.**

| #  | Reference                          | Time period Considered                  | Region                                   | SWT Temporal Resolution | Spatial Scale     | Hydrometeorological Parameters (partial list)                                                                  | Evaluation Metrics Used                                                       |
|----|------------------------------------|-----------------------------------------|------------------------------------------|-------------------------|-------------------|----------------------------------------------------------------------------------------------------------------|-------------------------------------------------------------------------------|
| 1  | <b>Foreman et al., 2001</b>        | 1953–1999, May to October               | Fraser, Thompson River, Canada           | Hourly                  | Local/ Watershed  | SWT                                                                                                            | Slope, $R^2$ , RMSE (called RMSD), standard error                             |
| 2  | <b>Risley et al., 2003</b>         | 1999, June to September                 | western Oregon (U.S)                     | Hourly                  | Regional          | SWT, riparian shade, elevation, % forested                                                                     | $R^2$ , RMSE                                                                  |
| 3  | <b>Sivri et al., 2007</b>          | 2001–2002                               | Province of Rize, NE Turkey              | Daily                   | Local / Watershed | Daily SWT, monthly mean AT, PPT, water quality parameters (DO, ph, etc.)                                       | $R^2$ , Sum of Squares Error (SSE)                                            |
| 4  | <b>Tao et al., 2008</b>            | 1986–2003                               | Yellow River, China                      | Daily                   | Local / Watershed | AT, water level, channel storage, discharge                                                                    | $R^2$                                                                         |
| 5  | <b>Chenard and Caissie, 2008</b>   | 10 years: 1992–2002                     | Miramichi River, Canada                  | Daily                   | Local / Watershed | Hourly water level, Daily AT, Hourly SWT                                                                       | RMSE, PBIAS, $R^2$                                                            |
| 6  | <b>Sahoo et al., 2009</b>          | 1997–2003 (varied by station)           | Lake Tahoe watershed                     | Daily                   | Regional          | AT, short-wave radiation                                                                                       | Mean error (E), $r$ , RMSE. MSE for training error.                           |
| 7  | <b>St-Hilaire et al., 2012</b>     | 5 years: 1993–1998,                     | Moisie River, Quebec, Canada             | Daily                   | Local / Watershed | AT, stream discharge                                                                                           | RMSE, relative bias (RB), NSE (called NTD)                                    |
| 8  | <b>Hong and Bhamidimarri, 2012</b> | Dec 2001–April 2002                     | Waikato River, New Zealand               | 10-min interval         | Local / Watershed | AT, barometric pressure, wind direction/speed, solar radiation, SWT, humidity, water level                     | RMSE, MSE                                                                     |
| 9  | <b>Grbic et al., 2013</b>          | 5 years: 1993–1998                      | Drava river, Croatia                     | Daily                   | Local / Watershed | SWT , Daily mean AT, Daily mean discharge                                                                      | NSE (called NSC), RMSE, MAE                                                   |
| 10 | <b>Hebert et al., 2014</b>         | 9 years: 1998–2007, April–October       | Miramichi River, Canada                  | Hourly                  | Local / Watershed | AT, SWT, daily mean discharge                                                                                  | RMSE, $R^2$ , PBIAS                                                           |
| 11 | <b>DeWeber and Wagner, 2014</b>    | 19 years, 1980–2010: May–October        | Eastern US                               | Daily                   | Regional          | AT, landform attributes, and forested land cover                                                               | RMSE, NSE, RMSE/SD, PBIAS                                                     |
| 12 | <b>Cole et al., 2014</b>           | 99 years: 1913–2012 (varied by station) | Delaware river                           | Daily                   | Local / Watershed | AT, wind speed, solar radiation, barometric pressure, dew point temp., relative humidity, sky cover, daily PPT | RMSE, NSE, PBIAS, Willmott index of agreement ( $d$ )                         |
| 13 | <b>Hadzima-Nyarko et al. 2014</b>  | 19 years: 1991–2010                     | Drava river, Croatia.                    | Daily                   | Local / Watershed | Daily mean AT, SWT                                                                                             | RMSE, normalized RMSE %, $r$ , NSE, NSE-A: adjusted coefficient of efficiency |
| 14 | <b>Piotrowski et al., 2015</b>     | 17 years: 11/01/1990–10/31/2000         | Biana, Spurasl, Tarnowska Rivers, Poland | Daily                   | Local / Watershed | AT, sun declination                                                                                            | MSE                                                                           |

|    |                                                 |                                                   |                                                                                    |                                          |                      |                                                                                    |                                          |
|----|-------------------------------------------------|---------------------------------------------------|------------------------------------------------------------------------------------|------------------------------------------|----------------------|------------------------------------------------------------------------------------|------------------------------------------|
| 15 | <b>Rabi et al., 2015</b>                        | 19 years:<br>1991–2010                            | Drava river,<br>Croatia.                                                           | Daily                                    | Local /<br>Watershed | Daily mean AT data,<br>Daily SWT data                                              | RMSE, RMSE %, $r$ , NSE, NSE-A           |
| 16 | <b>Jeong et al., 2016</b>                       | 18 years:<br>1991–2009                            | Soyang river,<br>South Korea                                                       | Hourly                                   | Local /<br>Watershed | Hourly air temp., hourly<br>SWT, hourly rainfall,<br>wind speed, wind<br>direction | RMSE, NSE<br>(called NASH), $r$ ,<br>$d$ |
| 17 | <b>Kwak et al., 2016</b>                        | 3 years:<br>2011–2014,<br>Summer                  | Fourchue River,<br>Quebec, Canada                                                  | Hourly<br>data<br>aggregated<br>to Daily | Local /<br>Watershed | SWT, AT, solar<br>radiation, relative<br>humidity, and wind<br>speed               | RMSE, PBIAS,<br>NSE                      |
| 18 | <b>Laanaya et al., 2017</b>                     | 10 years:<br>2005–2015,<br>(varied by<br>station) | Sainte-<br>Marguerite<br>River, Canada                                             | Hourly<br>data<br>aggregated<br>to Daily | Local /<br>Watershed | SWT, AT and stream<br>discharge                                                    | RMSE, PBIAS,<br>NSE (called NSC)         |
| 19 | <b>Liu et al., 2018</b>                         | 7 years:<br>2007–2014                             | Eel River,<br>Coastal CA                                                           | Daily                                    | Regional             | AT, SWT                                                                            | NSE, $R^2$ , RMSE<br>(for ANN model)     |
| 20 | <b>Voza and Vukovic, 2018</b>                   | 10 years:<br>2005–2015                            | Morava River,<br>Serbia                                                            | Monthly                                  | Regional             | SWT, water quality<br>parameters (DO, pH,<br>etc.)                                 | $R^2$ , Spearman's $\rho$                |
| 21 | <b>Temizyurek and Dadaser-Celik, 2018</b>       | 12 years:<br>1995–2007                            | Kizilirmak river,<br>Turkey                                                        | Monthly                                  | Local /<br>Watershed | AT, wind speed, relative<br>humidity, SWTs                                         | $R^2$ , RMSE                             |
| 22 | <b>Graf et al., 2019</b>                        | 39 years:<br>1984–2013                            | Warta River,<br>Poland                                                             | Daily                                    | Regional             | AT, SWT                                                                            | $R^2$ , RMSE, MAE                        |
| 23 | <b>Zhu, Heddam, Nyarko et al., 2019</b>         | 32 years:<br>1984–2016,<br>(varies by<br>station) | Drava River,<br>Croatia; Mentue,<br>Rhone,<br>Dischmaback<br>river,<br>Switzerland | Daily                                    | Local /<br>Watershed | AT, discharge, and<br>components of the<br>Gregorian calendar                      | $r$ , $d$ , RMSE, MAE                    |
| 24 | <b>Zhu, Heddam, Wu et al., 2019</b>             | 16 years:<br>2001–2017<br>(varies by<br>station)  | Cedar River<br>(WA), Fanno<br>Creek (OR),<br>Irondequoit<br>Creek (NY)             | Daily                                    | Local /<br>Watershed | AT, discharge, and<br>DOY                                                          | $r$ , $d$ , RMSE, MAE                    |
| 25 | <b>Zhu, Hadzima-Nyarko, Gao et al., 2019</b>    | 26 years:<br>1991–2017<br>(varies by<br>station)  | Drava river,<br>Croatia.                                                           | Daily                                    | Local /<br>Watershed | Daily SWT, AT                                                                      | $r$ , $d$ , RMSE, MAE                    |
| 26 | <b>Zhu, Nyarko, Hadzima-Nyarko et al., 2019</b> | 26 years:<br>1991–2017<br>(varies by<br>station)  | Drava river,<br>Croatia; 3 rivers<br>in Switzerland; 3<br>rivers in U.S.           | Daily                                    | Local /<br>Watershed | AT, discharge, DOY                                                                 | $r$ , $d$ , RMSE, MAE                    |
| 27 | <b>Zhu and Heddam, 2019</b>                     | 16 years:<br>2001–2017<br>(varies by<br>station)  | Cedar (WA),<br>Fanno (OR),<br>Irondequoit<br>Creek (NY)                            | Daily                                    | Local /<br>Watershed | AT, discharge, DOY                                                                 | $r$ , $d$ , RMSE, MAE                    |
| 28 | <b>Lu and Ma, 2020</b>                          | May–July<br>2019                                  | Tualatin River,<br>Oregon, U.S.                                                    | Hourly                                   | Local /<br>Watershed | AT, SWT, water quality<br>parameters (DO, ph,<br>etc.)                             | MAE, RMSE,<br>MAPE, RMSPE,<br>U1, U2     |
| 29 | <b>Qiu et al., 2020</b>                         | 28 years:<br>1977–1987,<br>1993–2011              | Yangtze River,<br>China                                                            | Daily                                    | Regional             | AT, discharge, DOY                                                                 | MAE, RMSE,<br>NSE, $R^2$                 |

|    |                                    |                               |                                                     |                                  |                          |                                                                                |                                                      |
|----|------------------------------------|-------------------------------|-----------------------------------------------------|----------------------------------|--------------------------|--------------------------------------------------------------------------------|------------------------------------------------------|
| 30 | <b>Krishnaraj &amp; Deka, 2020</b> | 12 years: 2005–2017           | Ganga River Basin, India                            | Monthly                          | Local / Watershed        | 20 parameters see Table 1, includes: SWT                                       | Spearman's <i>rho</i>                                |
| 31 | <b>Rahmani et al., 2021</b>        | 4 years: 2010–2014            | 118 basins in CONUS w/o dams                        | Daily                            | Point-scale across CONUS | SWT, discharge                                                                 | RMSE, median RMSE, PBIAS, NSE                        |
| 32 | <b>Feigl et al., 2021</b>          | 1977–2015 (varied by station) | Ten Austrian catchments                             | Daily                            | Regional                 | Daily mean/max/min AT, runoff, PPT, and global radiation.                      | MSE, MAE, RMSE                                       |
| 33 | <b>Piotrowski et al., 2021</b>     | 46 years: 1971–2017           | 3 from NW U.S., 2 from Poland                       | Daily                            | Local / Watershed        | AT and discharge                                                               | MSE, NSE (called NSC), AIC, BIC                      |
| 34 | <b>Abdi et al., 2021</b>           | June 10–July 18, 2016         | Los Angeles river, CA, U.S.                         | Hourly                           | Local / Watershed        | AT, relative humidity, wind speed, barometric pressure                         | MAE, RMSE, $R^2$                                     |
| 35 | <b>Graf and Aghelpour, 2021</b>    | 20 years: 11/1989–11/2009     | Warta River, Poland                                 | Daily                            | Regional                 | Time lag in SWT                                                                | $R^2$ , RMSE, Normalized RMSE, MAE, NSE (called NS). |
| 36 | <b>Rajesh and Rehana, 2021</b>     | 1989-2014                     | Tunga-Bhadra river, Shimoga Station, India          | Daily, also monthly, seasonal    | Local/ Watershed         | AT (avg./max/min), SWT                                                         | $R^2$ , MSE, RMSE, RSR, NSE, MAE, KGE                |
| 37 | <b>Heddham, Kim et al., 2022</b>   | 53 years: 1961–2014           | Orda river, several stations, Poland                | Daily                            | Regional                 | AT, DOY                                                                        | RMSE, MAE, NSE, $r$                                  |
| 38 | <b>Jiang et al., 2022</b>          | 3 years: 2015–2018            | Jinsha River Basin                                  | Daily                            | Regional                 | Daily avg./max/min AT, dew temp., discharge, DOY, wind speed, and PPT.         | RMSE, $R^2$ , NSE                                    |
| 39 | <b>Sadler et al., 2022</b>         | 34 years: 1980–2014           | CONUS                                               | Daily                            | Point-scale across CONUS | Daylight, PPT, short-wave radiation, snow-water equivalent, AT, vapor pressure | NSE, t-scores of the NSEs                            |
| 40 | <b>Weierbach et al., 2022</b>      | 40 years: 1980–2020           | Mid-Atlantic, Pacific NW catchments                 | Monthly                          | Regional                 | AT, solar radiation, discharge, month of year, drainage area and dam info      | RMSE, MAE, NSE, PBIAS                                |
| 41 | <b>Zanoni et al., 2022</b>         | 20 years: 1994–2014           | Adige river, NE Italy                               | Daily                            | Regional                 | SWT, and other water quality parameters (As, Cl, DO, etc.)                     | PBIAS, NSE, RMSE, KGE                                |
| 42 | <b>Heddham, Ptak et al., 2022</b>  | 27 years: 1987 - 2014         | Kaczawa, Orla, Nida, Krzna, Wieprz stations, Poland | Daily                            | Regional                 | SWT, mean AT, DOY                                                              | RMSE, MAE, NSE, $R^2$                                |
| 43 | <b>Hani et al., 2023</b>           | 2020, 2021: Summer months     | Sainte-Marguerite River, Canada                     | Hourly                           | Local                    | Discharge, AT, SWT,                                                            | Mean, Median, SD, RMSE, r-RMSE, NSE, PBIAS, r-Bias   |
| 44 | <b>Khosravi et al., 2023</b>       | 21 years: 2006–2022           | Delaware River, New Jersey, U.S.                    | Varied due to different duration | Local / Watershed        | SWT, discharge, water level, DO, turbidity, pH, specific conductance           | RMSE, $R^2$ , NSE (for loss function)                |
| 45 | <b>Topp et al., 2023</b>           | 42 years: 1980–2022           | Delaware River Basin (DRB), U.S.                    | Daily                            | Regional                 | AT, PPT, shortwave radiation, potential ET, stream width, slope, elevation     | RMSE, NSE, bias                                      |

|    |                                |                                           |                                                       |               |                          |                                                                                                |                                                                               |
|----|--------------------------------|-------------------------------------------|-------------------------------------------------------|---------------|--------------------------|------------------------------------------------------------------------------------------------|-------------------------------------------------------------------------------|
| 46 | <b>Rehana and Rajesh, 2023</b> | 37 years: 1980–2017 (varies by station)   | India: 7 catchments                                   | Monthly       | Regional                 | Monthly min. and max AT, SWT                                                                   | NSE, KGE, RSR, RMSE, MAE.                                                     |
| 47 | <b>Siegel et al., 2023</b>     | 33 years: 1990 - 2023                     | Pacific Northwest                                     | Daily         | Regional                 | SWT, Daily mean AT, daily modeled snow-pack data SWE, daily discharge                          | RMSE, MAE                                                                     |
| 48 | <b>Wade et al., 2023</b>       | 4 years: 2016–2020                        | CONUS                                                 | Monthly       | Point-scale across CONUS | 23 variables, includes: AT, monthly PPT, discharge                                             | RMSE normalized, $R^2$                                                        |
| 49 | <b>Souaissi et al., 2023</b>   | 15 years, 1960s–2023: May–October         | 24 river temp. stations, Switzerland                  | Monthly       | Regional                 | 14 variables include: catchment area, mean elevation, stream length, max annual AT, summer PPT | $R^2$ , RMSE, RRMSE, BIAS, Pearson correlation coefficients: area, mean, etc. |
| 50 | <b>Drainas et al., 2023</b>    | 1–41 years, 1980–2021 (varied by station) | 16 headwater streams, Bavaria, Germany                | Daily         | Regional                 | AT, DOY, discharge, water level and sunshine per day                                           | RMSE, $r$ , PBIAS                                                             |
| 51 | <b>Rozos, 2023</b>             | 1992–2014 (varied by station)             | Arno River, Sieve River (Italy), Bakas River (Greece) | Daily, Hourly | Local / Watershed        | Mean Areal Daily rainfall, ET, discharge, average annual rainfall/PPT                          | MSE, PBIAS                                                                    |
| 52 | <b>Rahmani et al., 2023</b>    | 6 years: 2010–2016                        | CONUS, (GAGES-II)                                     | Daily         | CONUS                    | 33 attributes including AT, SWT, DOY, etc.                                                     | PBIAS, NSE, KGE, RMSE (loss function, error minimization)                     |
| 53 | <b>He et al., 2024</b>         | 40 years: 1980–2020                       | Delaware River (NJ), Houston River (Texas)            | Daily         | Regional                 | Discharge, SWT, AT                                                                             | RMSE, NSE                                                                     |
| 54 | <b>Majerska et al., 2024</b>   | 10 years: 2012–2022, June to September    | Fuglebekken stream, Svalbard, Norway                  | Daily         | Local/ Watershed         | SWT, water level, ground temperature, radiation                                                | KGE                                                                           |

35

40

45

50 Supplemental Materials, Table S2. Data analysis techniques and/or ML algorithms used by studies. Reported training/calibration/validation included directly from studies.

| #  | Reference                   | Data Analysis Technique OR ML Algorithms Used                                                                                                                                       | Training (Zhu et al. 2019 studies label it as “calibration”), validation, testing          |
|----|-----------------------------|-------------------------------------------------------------------------------------------------------------------------------------------------------------------------------------|--------------------------------------------------------------------------------------------|
| 1  | Foreman et al., 2001        | Linear regression and neural networks (NNs)                                                                                                                                         | 4 years, 1995–1998, training, 21 years, 1953–1994 validation                               |
| 2  | Risley et al., 2003         | Feed-forward NN, three sets of NN models                                                                                                                                            | 33 % training, 66 % testing. Six of 148 streams randomly removed, used for validation.     |
| 3  | Sivri et al., 2007          | Multi-Layer Perceptron (MLPNN)                                                                                                                                                      | 2001: training, 2002: testing                                                              |
| 4  | Tao et al., 2008            | Back-propagation Neural network (BPNN)                                                                                                                                              | 14 years, 1986–1999, training, 4 years, 2000–2003, testing                                 |
| 5  | Chenard and Caissie, 2008   | MLPNNs models w/ variety of input parameters: 4 predict mean daily SWT and 4 predicted max daily SWT                                                                                | Training: 5 years, Testing: 2 years, Validation: 4 years                                   |
| 6  | Sahoo et al., 2009          | NN, statistical model (multiple regression analysis (MRA), and chaotic non-linear dynamic algorithms (CNDA).                                                                        | Training, validation: 3 years, 1999–2001 Testing: 1 year, 2002                             |
| 7  | St-Hilaire et al., 2012     | K-nearest neighbor (K-nn)                                                                                                                                                           | “The relatively small sample size precluded us from performing a split sample validation”. |
| 8  | Hong and Bhamidimarri, 2012 | Two DNFLMS modes: (1) online one-pass clustering, extended Kalman filtering algorithm (mode 1); and (2) extended Kalman filtering with BP algorithm trained to MSE.                 | Training 2.5 months, testing 1.5 months                                                    |
| 9  | Grbic et al., 2013          | Combination of Gaussian process regression (GPR) models                                                                                                                             | Training: 4 years, 1993–1996 Testing: 2 years, 1997–1998                                   |
| 10 | Hebert et al., 2014         | NN                                                                                                                                                                                  | Training: 4 years, 1998–2002 Validation: 5 years, 2003–2007                                |
| 11 | DeWeber and Wagner, 2014    | Four variations of FFNN models                                                                                                                                                      | 90 % training, 10 % validation, 2010 used as testing year                                  |
| 12 | Cole et al., 2014           | Generalized Least Squares w/ cosine (GLScos), AutoRegressive Integrated Moving Average (ARIMA), NN                                                                                  | Training: 4 years, 2008–2011, tested: 1 year, 2012                                         |
| 13 | Hadzima-Nyarko et al. 2014  | MLPNN and a radial basis function network (RBFNN)                                                                                                                                   | 80 % training, 20 % testing                                                                |
| 14 | Piotrowski et al., 2015     | MLPNN, product-unit NN, wavelet NN, adaptive-network-based fuzzy inference systems (ANFIS) and K-nn                                                                                 | Two sites training/validation/testing: 41/24/35, 40/30/30                                  |
| 15 | Rabi et al., 2015           | Six different MLPNNs                                                                                                                                                                | 80 % training, 20 % testing                                                                |
| 16 | Jeong et al., 2016          | FFNN                                                                                                                                                                                | Not Available                                                                              |
| 17 | Kwak et al., 2016           | (a) Deterministic model CEQUEAU; (b) ARMAX (AutoRegressive-Moving Average with eXogenous terms) stochastic model; and (c) NARX (Nonlinear AutoRegressive model w/ eXogenous input). | 75 % of data for training/calibration and 25 % of data for validation                      |
| 18 | Laanaya et al., 2017        | Generalized Additive Model (GAM), Logistic Model (LM), Residuals regression model (RRM), and Linear regression model (LRM)                                                          | Not explicitly stated                                                                      |
| 19 | Liu et al., 2018            | Integrated model of NN and VIC (not ML)                                                                                                                                             | 1.5–5 years (calibration), 0.75–2 years (validation)                                       |

|    |                                                 |                                                                                                                                                                                                                |                                                                                                                                         |
|----|-------------------------------------------------|----------------------------------------------------------------------------------------------------------------------------------------------------------------------------------------------------------------|-----------------------------------------------------------------------------------------------------------------------------------------|
| 20 | <b>Voza and Vukovic, 2018</b>                   | MLPNN                                                                                                                                                                                                          | Not explicitly stated                                                                                                                   |
| 21 | <b>Temizyurek and Dadaser-Celik, 2018</b>       | NN                                                                                                                                                                                                             | 50 % training, 25 % testing, and 25 % used as holdout                                                                                   |
| 22 | <b>Graf et al., 2019</b>                        | Wavelet Transform (WT) and NN hybrid model, using 4 mother wavelets: Daubechies, Symlet, discrete Meyer, and Haar. Tested against MLPNN.                                                                       | Stations used for:<br>Training (4 of 9), testing (3 of 9), validation (2 of 9)                                                          |
| 23 | <b>Zhu, Heddham, Nyarko et al., 2019</b>        | 4 ML models: (MLPNN) and (ANFIS) – w/ fuzzy c-mean clustering (ANFIS_FC), ANFIS w/ grid partition (ANFIS_GP), and ANFIS w/ subtractive clustering method (ANFIS_SC),                                           | Varied by station:<br>Training data: 6–20 years, ~67–73 %,<br>Validation data: 3–10 years, 27–33 %                                      |
| 24 | <b>Zhu, Heddham, Wu et al., 2019</b>            | Extreme learning machine (ELM), MLPNN and MLR models.                                                                                                                                                          | Training data: 8–11 years, ~70–75 %,<br>Validation data: 3–4 years, ~20–25 %                                                            |
| 25 | <b>Zhu, Hadzima-Nyarko, Gao et al., 2019</b>    | Hybrid models combining WT and NN (WTNN) and WT with ANFIS (WTANFIS), NN, ANFIS                                                                                                                                | Calibration/training: Botovo, 1991–2008, ~17 years. Donji 1993–2008, 15 years.<br>Validation: 2009–2016, 7 years for Botovo, Donji      |
| 26 | <b>Zhu, Nyarko, Hadzima-Nyarko et al., 2019</b> | (FFNN), (GPR), and (DT) models                                                                                                                                                                                 | Varied by station:<br>training data: 6–20 years, ~67–73 %,<br>validation: 3–10 years, 27–33 %                                           |
| 27 | <b>Zhu and Heddham, 2019</b>                    | Optimally pruned extreme learning machine (OPELM) and RBFNN                                                                                                                                                    | Training data: 8–11 years, ~70–75 %,<br>Validation data: 3–4 years, ~20–25 %                                                            |
| 28 | <b>Lu and Ma, 2020</b>                          | Extreme gradient boosting (XGBoost) and random forest (RF)                                                                                                                                                     | Training/testing: 9:1 ratio                                                                                                             |
| 29 | <b>Qiu et al., 2020</b>                         | BP_PSO model variations, based on BPNN (back propagation NN) optimized by PSO (particle swarm optimization) algorithm.                                                                                         | Cuntan: 13/17 years = 76.5 % (training), 4/17 years = 24.5 % (testing),<br>Datong: 7/9 years = 78 % (training), 2/9 years= 22 % testing |
| 30 | <b>Krishnaraj and Deka, 2020</b>                | k-means cluster analysis (CA), principal component analysis (PCA) and correlation                                                                                                                              | Not explicitly stated                                                                                                                   |
| 31 | <b>Rahmani et al., 2021</b>                     | LSTM                                                                                                                                                                                                           | 4 years, 67 %, training<br>2 years, 33 % testing                                                                                        |
| 32 | <b>Feigl et al., 2021</b>                       | Step-wise linear regression, RF, XGBoost, FFNNs, 2 (RNNs): LSTM and recurrent gated unit (GRU)                                                                                                                 | 60 % training, 20 % validation, 20 % testing                                                                                            |
| 33 | <b>Piotrowski et al., 2021</b>                  | MLPNNs, PUNN, extended logistic regression and air2stream (not ML)                                                                                                                                             | 66 % training, 33 % validation                                                                                                          |
| 34 | <b>Abdi et al., 2021</b>                        | Four models: single-layer (SLR), multilayer linear regression (MLR) and SLR and MLR-NN                                                                                                                         | 80% training, validation, and 20 % testing                                                                                              |
| 35 | <b>Graf and Aghelpour, 2021</b>                 | Autoregressive (AR), Moving Average (MA), Autoregressive Moving Average (ARMA). Autoregressive Integrated Moving Average (ARIMA), ANFIS, Radial Basis Function (RBF) and Group Method of Data Handling (GMDH). | 75 % training, 25 % testing                                                                                                             |
| 36 | <b>Rajesh and Rehana, 2021</b>                  | ML models - Ridge regression (RR), K-nn, Random forest, and SVR                                                                                                                                                | Not explicitly stated, cross-validation mentioned.                                                                                      |
| 37 | <b>Heddham, Ptak et al., 2022</b>               | K-nn, least square support vector machine (LSSVM), generalized regression (GRNN), cascade correlation artificial (CCNN), relevance vector machine (RVM), and locally weighted polynomials regression (LWPR).   | 70 % training, 30 % testing                                                                                                             |

|    |                                          |                                                                                                                                   |                                                                                                                                        |
|----|------------------------------------------|-----------------------------------------------------------------------------------------------------------------------------------|----------------------------------------------------------------------------------------------------------------------------------------|
| 38 | <b>Jiang et al., 2022</b>                | Decision trees (DT), RF, gradient boosting (GB), adaptive boosting (AB), SVR, MLPNN                                               | 60 % training, 40% testing                                                                                                             |
| 39 | <b>Sadler et al., 2022</b>               | LSTM                                                                                                                              | Years splits (Training/validation/testing): Exp. A, (25/4/4), Exp. B, (25/4/4), Exp. C, (2/4/4), Exp. D performance testing (31, 1, 1) |
| 40 | <b>Weierbach et al., 2022</b>            | SVR and XGBoost                                                                                                                   | 70 % training, 30 % testing                                                                                                            |
| 41 | <b>Zanoni et al., 2022</b>               | RF and FFNN, linear regression model                                                                                              | 70 % training, 30 % testing                                                                                                            |
| 42 | <b>Heddiam, Kim et al., 2022</b>         | Bat algorithm optimized extreme learning machines ELM (Bat-ELM), (MLPNN), (CART) and (MLR).                                       | 70 % training, 30 % validation                                                                                                         |
| 43 | <b>Hani et al., 2023</b>                 | Multivariate adaptive splines regression (MARS), generalized additive model (GAM), support vector machine (SVM), and (RF)         | Not explicitly stated                                                                                                                  |
| 44 | <b>Khosravi et al., 2023</b>             | LSTM                                                                                                                              | Roughly 70 % training, 30 % validation, not explicitly stated                                                                          |
| 45 | <b>Topp et al., 2023</b>                 | Process-guided deep learning (PGDL): Recurrent graph convolution network (RGCN), temporal convolution graph model (Graph WaveNet) | Two scenarios: Temp. shift 10/5/25 Drought 25/5/10                                                                                     |
| 46 | <b>Rehana and Rajesh, 2023</b>           | LSTM, integrated w/ k-NN bootstrap resampling (k-NN + LSTM), WT-LSTM. Air2stream (not ML)                                         | ~77–89 % training, ~11–23 % testing (in years): 18/4; 10/3; 24/3; 8/2; 11/2; 24/3; 11/3.                                               |
| 47 | <b>Siegel et al., 2023</b>               | Generalized Additive Model (GAM)                                                                                                  | leave-one-year-out cross validation; leave-one-region-out cross-validation                                                             |
| 48 | <b>Wade, Kelleher &amp; Hannah, 2023</b> | RF                                                                                                                                | 80 % training, 20 % testing                                                                                                            |
| 49 | <b>Souaissi et al., 2023</b>             | RF, XGBoost, w/ non-parametric MARS and GAM.                                                                                      | Not explicitly stated                                                                                                                  |
| 50 | <b>Drainas et al., 2023</b>              | NN                                                                                                                                | 90 % training, 10 % testing                                                                                                            |
| 51 | <b>Rozos, 2023</b>                       | RNN w/ LSTM, K-nn w/ Bluecat                                                                                                      | 70 % training, 30 % testing                                                                                                            |
| 52 | <b>Rahmani et al., 2023</b>              | LSTM, SN-TEMP (process-based model)                                                                                               | 67 % training (4 years), 33 % testing (2 years)                                                                                        |
| 53 | <b>He et al., 2024</b>                   | LSTM+GNN                                                                                                                          | 67 % training, 33 % validation                                                                                                         |
| 54 | <b>Majerska et al., 2024</b>             | GPR                                                                                                                               | Five-fold cross-validation; unclear % training vs % testing/validation                                                                 |
