# Supplementary material for: Machine Learning in Stream/River Water Temperature Modelling: a review and metrics for evaluation
Source: Copernicus journal article supplement (doi:10.5194/hess-2024-256), 2024-08-26
Supplement: Supplementary file [file hess-2024-256-AC1-supplement.pdf]

## 1 Referee #2 Comments

2 This is a meaningful manuscript that provides a thorough review of ML approaches for SWT modeling  
 3 and their evaluation metrics. I believe that the current scientific community has indeed developed a broad  
 4 understanding of the integration of ML into stream temperature modeling. Hence, while the manuscript  
 5 presents a comprehensive overview, incorporating more in-depth insights could enhance its appeal to  
 6 readers and significantly increase its contribution to the field. The review covers a wealth of content,  
 7 including recent articles and other reviews, but the sections are somewhat loosely structured, with key  
 8 points relatively briefly mentioned.

9 **AUTHOR RESPONSE:** We thank the referee for their time and feedback, we believe the manuscript is  
 10 stronger as a result. We address specific referee comments below. For reference, we separated some  
 11 referee comments into a, b, etc., to provide a more organized response. **Proposed new/edited text is in**  
 12 **BLUE.**

13  
 14  
 15 **1.** For instance, in the first section (Overview: SWT Model Types), the author provides a solid overview  
 16 of statistical, physical, and ML models. However, a more detailed analysis of the comparative strengths  
 17 and weaknesses of physical and ML models would strengthen the discussion. The models are presented in  
 18 a nearly linear developmental order in this review, but it would be beneficial to mention some points, for  
 19 example, [if] physical models perform well, why ML models are adopted[?].

20 **AUTHOR RESPONSE:** The referee makes a good point with regards to the question of “if physical  
 21 models perform well, why are ML models being adopted?”. We have expanded the section “Artificial  
 22 Intelligence Models in SWT Modeling” to discuss this:

23  
 24 “In the last decade, computing advances in AI have started to offer several advantages for using  
 25 machine learning (ML) in hydrology that are comparable to physically based models (Cole et al., 2014;  
 26 Zhu et al., 2019; Rehana and Rajesh, 2023). In contrast to traditional physically based models, the code  
 27 underlying ML models are generally open-source and publicly available allowing for near real-time  
 28 accessible advances and user feedback, whereas the source code for some physically based models may  
 29 be inaccessible to the public due to being privately managed (MIKE suite of models) or the model  
 30 software may be publicly available but take years to publish updates (USGS MODFLOW, Simunek’s  
 31 HYDRUS). One advantage that has made ML increasingly appealing includes its ability to learn  
 32 directly from the data (i.e., data driven), which can be useful when the underlying physics are not fully  
 33 understood or are considered too complex to model accurately.

34 Additionally, ML models are more efficient in making predictions compared to the time-intensive  
 35 solvers of physically based models. ML models can also handle the challenge of scalability, that is  
 36 managing large datasets and seamlessly deploying across various computer platforms and applications  
 37 (Rehana and Rajesh, 2023). Air2stream, a hybrid statistical-physically based SWT model (Toffolon and  
 38 Piccolroaz, 2015; Piccolroaz et al., 2016), initially outperformed earlier ML models such as Gaussian  
 39 Process Regression (Zhu et al., 2019). Though in the last few years, Air2stream has had its performance  
 40 matched and even exceeded by recent neural networks models (Feigl et al., 2021; Rehana and Rajesh,  
 41 2023).

42 Finally, with computer processing power improving and the emergent field of quantum computing,  
 43 there is a strong belief amongst scientists, stakeholders and the public, that using ML and by extension  
 44 AI, in science applications will drive innovation to the point where natural patterns and insights not  
 45 currently apparent in physical modeling will be uncovered (Varadharajan et al., 2022). Thus, while  
 46 physically based models are considered tried-and-true, thereby invaluable for their interpretability and  
 47 grounding in established physics, ML models have the potential for growth – where they can be used  
 48 to first complement and eventually lead as powerful tools for prediction, optimization, and  
 49 understanding in increasingly complex and data-rich environments.”

50  
 51

1 New citation:

2 Toffolon, M. and Piccolroaz, S., 2015. A hybrid model for river water temperature as a function of air  
3 temperature and discharge. *Environmental Research Letters*, 10(11), p.114011.

4  
5 2. How to gain the trust of traditional model users in ML methods? (This question is inherently  
6 challenging, as model users often have preferences based on their own familiarity with certain models and  
7 may exhibit biases against alternative approaches. However, it may be worthy to acknowledge this in the  
8 review.) This discussion could extend to the choice between different ML models as well, as conclusions  
9 favoring one model over another often depend on the specific context of the study. Many conclusions are  
10 applicable only under particular circumstances, so a generalization such as “a certain model is better  
11 suited to a particular type of problem” is more appropriate.

12 **AUTHOR RESPONSE:** We agree and appreciate the referee’s feedback. We address this comment in  
13 our response to referee #1 for comment #3 (copied below) titled “Future Directions”, where we discuss  
14 how researchers can work to present their ML models as trustworthy. For this, we propose adding a new  
15 ‘Discussion’ subsection, titled ‘Future Directions of SWT Modeling’, with the following:

16  
17 The utility of ML in hydrologic modeling has come a long way, with interest seemingly growing  
18 exponentially (Nearing et al., 2021). With the novelty of ML, it is easy to get lost in the value of how  
19 well a model performs and ignore the science, but with several decades of ML-experience, we think it  
20 necessary to urge the scientific community to purposefully use ML address physically-meaningful  
21 questions and not just create ML for the sake of creating. Given this, Varadharajan et al. (2022) laid  
22 out an excellent discussion on opportunities for advancement of ML in water quality modeling, see  
23 section 3 of publication (Varadharajan et al., 2022). Here we highlight some of the questions from  
24 Varadharajan et al. (2022) that can be considered in the context of what the objectives of the SWT  
25 community should be in the ML era, namely: 1) How do we use physical knowledge (re: heat  
26 exchange equations, radiation influence) to improve models and process understanding? Rahmani et  
27 al. (2023) coupled NNs with the physical knowledge from SNTMP, a one-dimensional stream  
28 temperature model that calculates the transfer of energy to or from a stream segment by either heat  
29 flux equations or advection, but found that even with SNTMP, their flexible NNs exhibited  
30 substantial variance in prediction and needed to be constrained by further multi-dimensional  
31 assessments (Rahmani et al., 2023). In short, if our use of physics in machine learning makes our  
32 models worse, we must know why.

33 A second question that needs addressing is 2) How do we deal with predictive uncertainty in ML  
34 used for SWT modeling? According to Moriasi et al. (2007), uncertainty analysis is the process of  
35 quantifying the level of confidence in any given model output based on five guidelines: 1) the quality  
36 and amount of observations (data), 2) the lack of observations due to poor or limited field monitoring,  
37 3) the lack of knowledge of physical processes or operational procedures (instrumentation), 4) the  
38 approximation of our mathematical equations, and 5) the robustness of model sensitivity analysis and  
39 calibration. For example, in rainfall-runoff modeling, researchers have proposed benchmarking to  
40 examine uncertainty predictions of ML rainfall-runoff modeling (Klotz et al., 2022). For stream  
41 temperature modeling, researchers have attempted to address the role of uncertainty in deep learning  
42 model (RGCN, LSTM) prediction using the Monte Carlo Dropout (Zwart, Oliver, et al., 2023) and a  
43 unimodal mixture density network approach (Zwart, Diaz, et al., 2023).

44 Other questions that SWT-ML studies should consider is 3) How do we make ML models  
45 generalize better, specifically with regards to ungauged basins? And 4) How can ML models be  
46 improved to predict extremes? As ML models advance to use satellite data, include more sensor  
47 networks and/or couple with climate models, there is a logical next step toward creating generalizable  
48 models that can account for extremes. In our review, only two papers by the same group (Rahmani et  
49 al., 2020, 2023) conducted a CONUS-scale approach towards SWT-ML modeling, omitting  
50 hydrologically important regions in the southwest (CA) and southeast (FL). Recently, a satellite  
51 remote sensing paper used RF to model monthly stream temperature across the CONUS and tested for  
52 temporal (walk-forward validation), unseen and ‘true’ ungauged regions (Philippus et al., 2024). We  
53 have also learned that ML models such as LSTMs, generally only make predictions within the bounds

1 of their training data (Kratzert et al., 2019), which is a limitation for predicting extremes. Thus, we  
 2 strongly urge the community to work towards ML models that generalize better and/or are more  
 3 robust towards predictions of extremes.

4 Finally, 5) How can we build ML models such that they are seen as trustworthy and  
 5 interpretable by the hydrologic community? To answer this question, we must address a technical  
 6 barrier (black-box issues, data limitations, model uncertainty) and a social barrier (i.e., educated  
 7 skepticism of ML due to novelty, little understanding of computer science basics and/or coding  
 8 experience). If we are to incorporate ML into more of the decision-making process, it makes sense  
 9 that ML must be transparent and understandable to more than just computer scientists (Varadharajan  
 10 et al., 2022). For example, Topp et al. (2023) recently used explainable AI to elucidate how ML  
 11 architectures affected the SWT model’s spatial and temporal dependencies, and how that in turn  
 12 affected the model’s accuracy. Addressing this technical barrier can also be done by improving access  
 13 to data, which has seen remarkable progress thanks to web repositories such as NSF-funded  
 14 CUAHSI’s Hydro share (CUAHSI, 2024) and GitHub (GitHub, 2024). In the United States, data  
 15 access to state and locally-based data remains limited, and should be addressed. In terms of the social  
 16 barrier, education about ML and ML-use is key. Societal interest in ML has thankfully also lead to a  
 17 plethora of educational resources and ML walk-through videos and tutorials in TensorFlow (Abadi et  
 18 al., 2015), PyTorch (Abadi et al., 2015), and Google Colab (Bison, 2019). With how fast ML-use is  
 19 evolving, short communication pieces (Capuchin et al., 2019) and opinion pieces (Kratzert et al.,  
 20 2024) with clear examples about an ML-issue and practical solutions could also help make ML  
 21 challenges more transparent and therefore accessible to the hydrologic community-at-large.  
 22  
 23

24 **3a.** Furthermore, the author may not clearly (separately) present the generalization capabilities of ML  
 25 models in temporal and spatial contexts, which is crucial for data split. The model ability of  
 26 generalization over time is particularly meaningful for climate change studies, where overfitting (common  
 27 for ML studies) may lead to highly unreliable projections. Spatial generalization is useful for applying  
 28 models to new regions or watersheds ( ungauged stream/river/watershed).

29 **AUTHOR RESPONSE:** We agree. Referee #1 made a similar comment (ref #1, comment #1A) about  
 30 overfitting and having ML undergo more testing and we propose to address both comments by adding: 1)  
 31 a subsection under “section 2.4 SWT Predictions using ML” on overfitting/underfitting and 2) a diagram  
 32 showing initial steps to mitigate overfitting. The new text is below:  
 33

#### 34 Subsection 2.4.X Overfitting and Underfitting

35  
 36 When a model is too complex, i.e., has too many features or too many parameters relative to the  
 37 number of observations, or is forced to overextend its capabilities, i.e., make predictions with  
 38 insufficient training data, the model runs the risk of overfitting (Srivastava et al., 2014). An  
 39 overfitting model fits the training data “too well”, capturing noise and details that provide high  
 40 accuracy on a training dataset, only to perform poorly once the model encounters “unseen” data in  
 41 testing/validation (Xu and Liang, 2021). Scenarios where overfitting may be temporarily acceptable  
 42 are those where: 1) model development is at its preliminary stages, where the interest is in a “proof of  
 43 life” concept, 2) when the objective is to identify heavily-relied on features by the model, i.e., feature  
 44 importance, or 3) in highly-controlled modeling environments where the expected data will be  
 45 consistently similar to the training dataset. The latter is more likely in certain industrial applications  
 46 and unlikely in the changing nature of hydrology.  
 47

48 In contrast, underfitting occurs when a model is too simple to capture any patterns in the data,  
 49 which can also lead to terrible performance in training, testing and validation. Underfitting can occur  
 50 with inadequate model features, poor model complexity or when regularization techniques, (e.g., L1  
 51 or L2 regularization), are over-used, making the model too rigid and unable to respond to changes in  
 52 the data. Given the propensity of machine learning models to effectively learn the training data,

1 underfitting is less of an issue in ML whereas overfitting can be widespread. In the following  
 2 diagram, we present an example workflow to transition away from overfitting and towards  
 3 generalizability. We further encourage modelers to actively transition towards making more  
 4 generalizable models, which are in theory, more capable of performing well across diverse scenarios  
 5 and datasets, which will become increasingly important with the persistence of climate extremes.  
 6  
 7

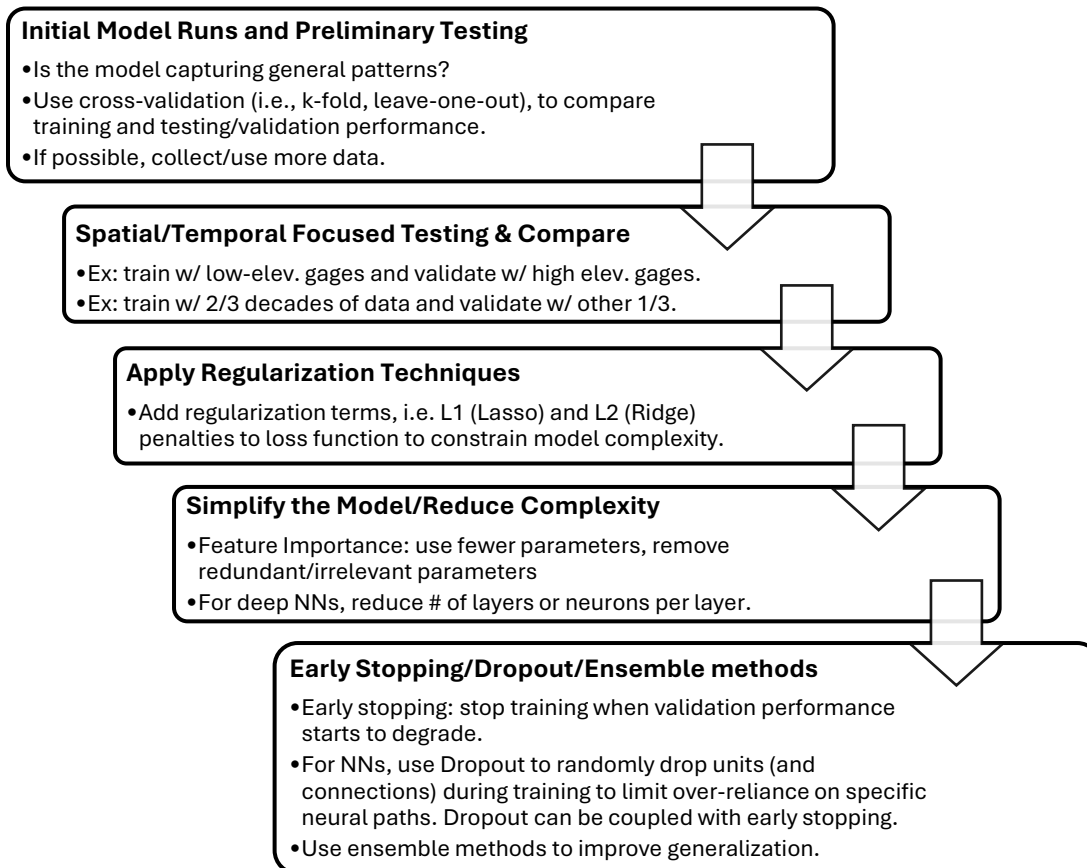

8  
 9 Figure XX. Diagram showing steps that can be taken in modeling process to mitigate overfitting.

10  
 11  
 12 With regards to generalization, we propose to address this comment and a similar one made by ref #1  
 13 (comm# 3) by adding a new Discussion subsection, titled 'Future Directions of SWT Modeling'. Below is  
 14 our response in that section (full section is copied at comment #2) about generalization:

15  
 16 Another question that SWT-ML studies should consider is 2) How do we make ML models  
 17 generalize better, specifically with regards to un-gauged basins? And 3) How can ML models be  
 18 improved to predict extremes? As ML models advance to use satellite data, incorporate more sensor  
 19 networks and/or couple with climate models, there is a logical next step towards creating  
 20 generalizable models. In our review, only two papers (Rahmani et al., 2020, 2023) conducted a  
 21 CONUS-scale approach towards SWT-ML modeling, but omitted large parts of the southwest (CA)  
 22 and southeast (FL), two hydrologically important regions. Recently, a satellite remote sensing RF was  
 23 used to model monthly SWT across the CONUS and tested for temporal (walk-forward validation),  
 24 unseen and 'true' un-gauged regions, with the model architecture potentially generalizable due to it not  
 25 being location-specific (Philippus et al., 2024). We have also learned that certain ML models such as  
 26 LSTMs, can only predict within the bounds of their training data (Kratzert et al., 2019), which is a  
 27 limitation for predicting extremes. Thus, we strongly urge the community to work towards ML  
 28 models that generalize better and/or are more robust towards predictions of extremes.

1 **3b.** Additionally, the review does not systematically address the critical issue of model input selection,  
 2 which is essential in ML modeling. Model inputs for SWT modeling may include hydrometeorological  
 3 and physical parameters (or other attributes used in different studies), they play a role in model  
 4 performance and should be discussed in this part.

5 **AUTHOR RESPONSE:** Thank you for pointing out this area in need of clarity. Referee #1, comment #4  
 6 had a similar question about model input, and we propose adding the paragraph below in response to  
 7 both. Additionally, we want to note that we included in Supplementary Materials, Table S1, which  
 8 contains some of the suggested data by the referee, such as: period considered, region examined, temporal  
 9 resolution of SWT, spatial scale of study, and hydrometeorological parameters used for modeling.

10  
 11 This section will likely precede the “Local” and “Regional” subsections of 2.4 and be titled Model Inputs  
 12 for ML-SWT:

13  
 14 Using air temperature (AT) to better understand SWT has been considered since at least the  
 15 1960s, when Ward (1963) and Edinger et al. (1968) discussed the influence of air temperature on  
 16 SWT. Since then, studies have used varying input variables (see Table S1), however, the model inputs  
 17 of AT and SWT continue to be the most used in ML-modeling studies. In particular, studies have  
 18 used AT from time periods outside of the known SWT record to improve model performance (Sahoo  
 19 et al., 2009; Piotrowski et al., 2015; Graf et al., 2019). In addition to AT and SWT, flow discharge has  
 20 been used to attempt to constrain SWT (Foreman et al., 2001; Tao et al., 2008; St-Hilaire et al., 2011;  
 21 Grbić et al., 2013; Piotrowski et al., 2015; Graf et al., 2019; Qiu et al., 2020). Traditionally-used  
 22 model inputs include precipitation (Cole et al., 2014; Jeong et al., 2016; Rozos, 2023), wind  
 23 direction/speed (Hong and Bhamidimarri, 2012; Cole et al., 2014; Jeong et al., 2016; Kwak et al.,  
 24 2016; Temizyurek and Dadaser-Celik, 2018; Abdi et al., 2021; Jiang et al., 2022), barometric pressure  
 25 (Cole et al., 2014), landform attributes (Risley et al., 2003; DeWeber and Wagner, 2014; Topp et al.,  
 26 2023; Souaissi et al., 2023), and many more (see Table S1).

27 In the last few years, including the day-of-year as an input, DOY (Qiu et al., 2020; Heddam et  
 28 al., 2022; Drainas et al., 2023; Rahmani et al., 2023) and humidity where available (Cole et al., 2014;  
 29 Hong and Bhamidimarri, 2012; Kwak et al., 2016; Temizyurek and Dadaser-Celik, 2018; Abdi et al.,  
 30 2021), have also shown to better capture the seasonal patterns of SWT (Qiu et al., 2020; Philippus et  
 31 al., 2024). With improved access to remote sensing data, there has also been a notable increase of  
 32 satellite products such as estimates of sky cover (Cole et al., 2014), solar radiation (Kwak et al., 2016;  
 33 Topp et al., 2023; Majerska et al., 2024), sunshine per day (Drainas et al., 2023) and potential ET  
 34 (Rozos, 2023; Topp et al., 2023). However, more research is needed to better understand the  
 35 influence of newer model inputs on SWT (Zhu and Piotrowski, 2020).

36 Most recently, SWT studies focused on the CONUS-scale have chosen to use as many model  
 37 inputs as available, with Wade et al. (2023), a point-scale CONUS ML study using over 20 variables,  
 38 while Rahmani et al. (2023) created a LSTM model and considered over 30 variables to simulate  
 39 SWT. Despite the use of diverse data, the models performed only satisfactorily and were deemed not  
 40 generalizable, leaving much room for improvement in CONUS-scale modeling of SWT. With the  
 41 compilation of larger and larger datasets, feature importance in ML, that is the process of using  
 42 techniques to assign a score to model input features based on how good the features are at predicting  
 43 a target variable, can be an efficient way to improve data comprehension, model performance, and  
 44 model interpretability, the latter of which can dually serve as a transparency marker of which features  
 45 are driving predictions. Methods for measuring feature importance include using correlation criteria  
 46 (Pearson’s  $r$ , Spearman’s  $\rho$ ), permutation feature importance (shuffling feature values, measuring  
 47 decrease in model performance), linear regression feature importance (larger absolute values indicate  
 48 greater importance), or if using CART/RF/gradient boosting, entropy impurity measurements can be  
 49 insightful (Venkateswarlu and Anmala, 2023).

50  
 51 *Moved from section 2.3.1, (original lines 246-253) to new section Model Inputs for ML-SWT:*

52 For example, one technique that can be used to improve ML model parameter selection is the

1 *Least Absolute Shrinkage and Selection Operator (LASSO)*, a regression technique used for feature  
 2 selection (Tibshirani, 1996). Research utilizing ML models for SWT frequency analysis at unged  
 3 basins used the LASSO method to select explanatory variables for two ML models (Souaissi et al.,  
 4 2023). The LASSO method consists of a shrinkage process where the method penalizes coefficients  
 5 of regression variables by minimizing them to zero (Tibshirani, 1996). The number of coefficients set  
 6 to zero depends on the adjustment parameter, which controls the severity of the penalty. Thus, the  
 7 method can perform both feature selection and parameter estimation, an advantage when examining  
 8 large datasets (Xu & Liang, 2021).

9  
 10  
 11 **4.** In the second section, the authors do an excellent job summarizing model evaluation metrics. However,  
 12 considering that ML models are often optimized to achieve superior performance on these metrics, there  
 13 is (always) a risk of overfitting. Thus, beyond focusing on metrics, the review should also highlight the  
 14 importance of more rigorous evaluation to further assess generalization ability. For instance, if a SWT  
 15 model is built to run climate change scenarios, additional testing and more rigorous designs are essential  
 16 to evaluate the model's ability to generalize over time. For robust long-term predictions, the model is  
 17 supposed to maintain robust predictive performance in completely unseen periods, rather than being  
 18 limited to a specific temporal range.

19 **AUTHOR RESPONSE:** We agree. This comment has similar themes to our response to #3a regarding  
 20 overfitting and highlighting the need for generalization, please see comment #3a for a full response.

21  
 22 For the comment regarding having ML undergo more rigorous testing, we propose adding the following  
 23 discussion for more rigorous testing for MLs. We added a few sentences (blue is new) to the Discussion  
 24 subsection titled “ML as Knowledge Discovery” where we urge for TUURTs (Temporal, Unseen,  
 25 Ungaged Region Tests):

26  
 27 Our review finds that ML studies examining SWT have been conducted from a computational  
 28 perspective, one with a focus on comparing techniques and performance metrics as opposed to  
 29 explaining the nature of SWT dynamics or influencing processes. *While it is understandable that not*  
 30 *every ML-SWT paper aims to explain physical processes, we think the SWT community should come*  
 31 *together and agree on a baseline of tests that all ML-SWT models should undergo for model*  
 32 *robustness and transferability. Along these lines, we urge consideration of TUURTs (temporal,*  
 33 *unseen, unged region tests) for future ML-SWT models as a helpful step towards not only better*  
 34 *modeling practices but also increased model transparency and robustness. For this, we clarify that*  
 35 *testing for “unseen” cases means testing only within the developmental dataset, whereas testing for*  
 36 *“ungaged” cases means testing for new sites that have not been previously seen by the model at all.*  
 37 *Recent ML-SWT studies have only applied one or two of the tests, but not all three (Topp et al.,*  
 38 *2023; Hani et al., 2023, Souaissi et al., 2023). Siegel et al. (2023), a non-ML SWT paper, tested for*  
 39 *ungaged and unseen data but did not perform a temporal test. A relatively new study, Philippus et al.*  
 40 *(2024), appears to be the only published SWT-ML study that purposefully applied TUURTs with*  
 41 *some success.*

42  
 43  
 44 *Overall, this review is informative and well-researched, and with more refined organization and deeper*  
 45 *exploration of these key issues, it could make a substantial contribution to the field of SWT research.*

46 **AUTHOR RESPONSE:** Thank you! This would certainly not be possible without the insightful  
 47 feedback from referees.
