# Supplementary material for: Machine Learning in Stream/River Water Temperature Modelling: a review and metrics for evaluation
Source: Copernicus journal article supplement (doi:10.5194/hess-2024-256), 2024-08-26
Supplement: Supplementary file [file hess-2024-256-AC2-supplement.pdf]

## 1 Referee #1 Comments

2 The manuscript on “*ML in Stream/River Water Temperature Modeling, a review and metrics for*  
3 *evaluation*” focuses on providing a comprehensive review of ML studies, including traditional and recent  
4 methods in ML and AI, on stream temperature modeling and prediction. Overall, the manuscript is well-  
5 written and covers most of the relevant papers, but there are a few strategic points I would like to share  
6 with the authors:  
7

8 **AUTHOR RESPONSE:** We appreciate the referee’s feedback and think the manuscript is much  
9 improved as a result. For reference, we separated some referee comments into a, b, etc., to provide a more  
10 organized response. Thank you for your time and insight. [Proposed new/edited text is in BLUE.](#)  
11

12  
13 **1a.** Figures 1 & 2 & 3 & table 2: The manuscript provides a table for multiple metrics such as R2, NSE,  
14 RMSE, and MAE, and suggested a rate of numbers to rate the ML methods’ performances. This table is  
15 based on the metrics that have been achieved by the studies in the previous years which are reflected in  
16 figures 1 & 2 & 3. However, those studies vary in terms of case studies, number of basins included in the  
17 study, running regional or local models. We know that ML models are prone to overfitting, especially for  
18 stream temperature that follows a relatively sinusoidal curve through a year, which means it is more  
19 predictable for complex models such as LSTM. However, it means the models are prone to easily overfit.  
20 Therefore, I suggest the authors encourage the stream temperature researchers to go towards making more  
21 generalizable models and less overfitted. For example, instead of suggesting performance metrics, the  
22 authors can provide a few steps to make sure the models are not overfitted or underfitted. For instance,  
23 always considering a spatial test on ungauged sites (basins). We know that spatial tests are more difficult  
24 tasks rather than temporal tests.  
25

26 **AUTHOR RESPONSE:** We agree that the SWT studies vary spatially/temporally and that ML models  
27 risk overfitting. We appreciate the referee’s comments in pointing out areas of improvement and suggest  
28 adding the following: 1) a new subsection under section 2.4 “SWT Predictions using ML” on  
29 overfitting/underfitting and 2) a diagram showing initial steps to mitigate overfitting. The new text is  
30 below:  
31

### 32 Section 2.4.X, Overfitting and Underfitting

33  
34 When a model is too complex, i.e., has too many features or too many parameters relative to the  
35 number of observations, or is forced to overextend its capabilities, i.e., make predictions with  
36 insufficient training data, the model runs the risk of overfitting (Srivastava et al., 2014). An  
37 overfitting model fits the training data “too well”, capturing noise and details that provide high  
38 accuracy on a training dataset, only to perform poorly once the model encounters “unseen” data in  
39 testing/validation (Xu and Liang, 2021). Scenarios where overfitting may be temporarily acceptable  
40 are those where: 1) model development is at its preliminary stages, where the interest is in a “proof of  
41 life” concept, 2) when the objective is to identify heavily-relied on features by the model, i.e., feature  
42 importance, or 3) in highly-controlled modeling environments where the expected data will be  
43 consistently similar to the training dataset. The latter is more likely in certain industrial applications  
44 and unlikely in the changing nature of hydrology.  
45

46 In contrast, underfitting occurs when a model is too simple to capture any patterns in the data, which  
47 can also lead to terrible performance in training, testing and validation. Underfitting can occur with  
48 inadequate model features, poor model complexity or when regularization techniques, (e.g., L1 or L2  
49 regularization), are over-used, making the model too rigid and unable to respond to changes in the  
50 data. Given the propensity of machine learning models to effectively learn the training data,  
51 underfitting is less of an issue in ML whereas overfitting can be widespread. In the following  
52 diagram, we present an example workflow to transition away from overfitting and towards  
53 generalizability. We further encourage modelers to actively transition towards making more

1 generalizable models, which are in theory, more capable of performing well across diverse scenarios  
 2 and datasets, which will become increasingly important with the persistence of climate extremes.

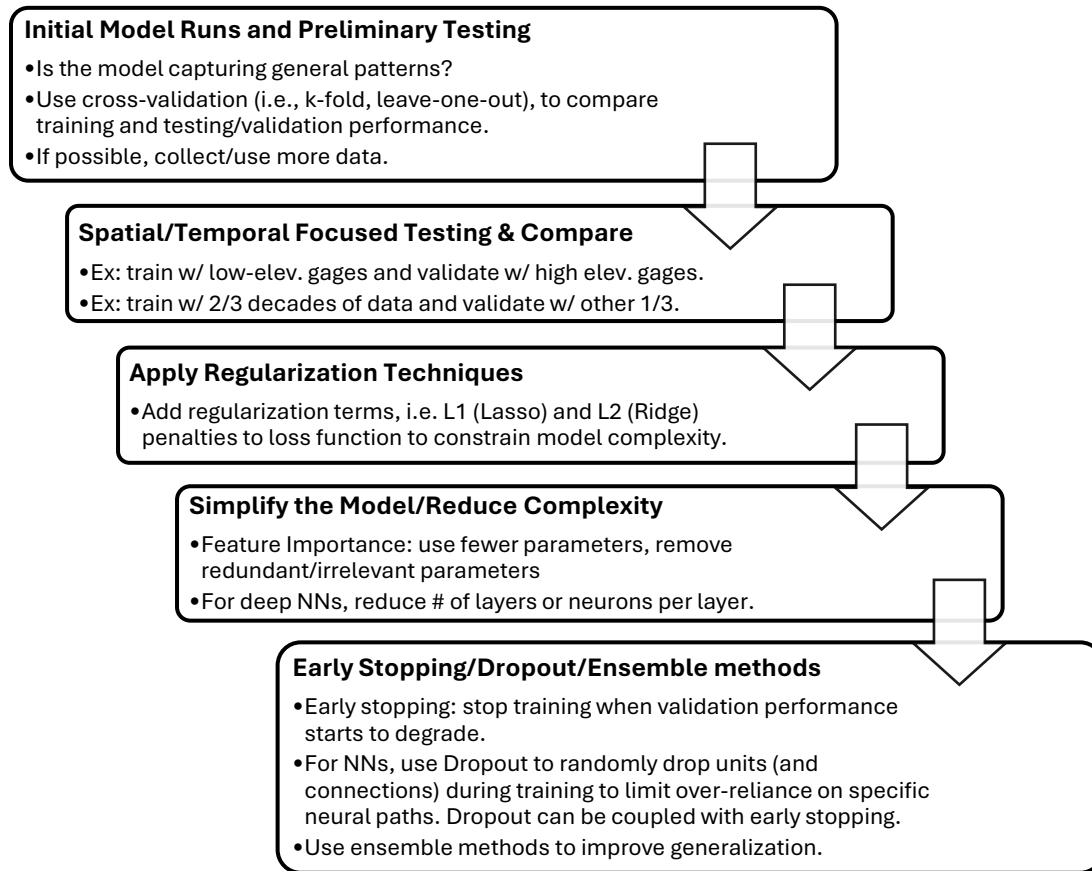

3  
 4 Figure XX. Diagram showing steps that can be taken in modeling process to mitigate overfitting.  
 5  
 6

7 **1b.** Therefore, it is acceptable to get lower performance on ungauged basins, however, the metrics should  
 8 not be vastly different from temporal tests. A more challenging experiment is to test the trained model on  
 9 regions that have not been seen by the model. In theory, if a model has been able to capture true relations  
 10 between the driving factors on stream temperature, it should achieve a relatively decent performance on  
 11 basins with different hydrologic, geologic, and climatic characteristics from the trained basins. As a  
 12 researcher on SWT, I would rather to have a model that passes all these three tests (temporal, ungauged,  
 13 unseen regions) with relatively close metrics, rather than having a model that gives high performance in  
 14 temporal tests and low performance in the other two tests.  
 15

16 **AUTHOR RESPONSE:** We agree. The referee mentions a key point that having a SWT model pass all  
 17 three tests for temporal, ungauged, and unseen regions may be more qualitatively sound, but as of initial  
 18 submission, we had not yet seen any ML-SWT papers that test for all three cases. A newly published  
 19 example, Philippus et al. (2024), has been added. For example, Topp et al. (2023) held out a region to be  
 20 considered “unseen” but did not test for ungauged basins. Hani et al. (2023) used an inverse weighted  
 21 distance interpolation method to estimate values for ungauged sites but did not test for “unseen” data.  
 22 Souaissi et al. (2023) used a leave-one-out cross-validation technique to mimic the estimation of  
 23 quantiles at ungauged sites by temporarily removing the gaged site information, which is arguably not  
 24 testing for new, ungauged sites but rather “unseen” (i.e., tested only within the development dataset, not  
 25 for new sites). Siegel et al. (2023), a non-ML paper tested for “ungauged” and “unseen” data, but did not  
 26 perform a temporal test. We further agree with the theory posited by the referee that a model capturing  
 27 true relations should perform acceptably, however, we have yet to see a study that has captured all true  
 28 relations.

1  
2 We have added a few sentences (blue is new) to the Discussion subsection titled “ML as Knowledge  
3 Discovery” where we urge for TUURTs (Temporal, Unseen, Ungaged Region Tests):  
4  
5

6 Our review finds that ML studies examining SWT have been conducted from a computational  
7 perspective, one with a focus on comparing techniques and performance metrics as opposed to  
8 explaining the nature of SWT dynamics or influencing processes. While it is understandable that not  
9 every ML-SWT paper aims to explain physical processes, we think the SWT community should come  
10 together and agree on a baseline of tests that all ML-SWT models should undergo for model  
11 robustness and transferability. Along these lines, we urge consideration of TUURTs (temporal,  
12 unseen, ungaged region tests) for future ML-SWT models as a helpful step towards not only better  
13 modeling practices but also increased model transparency and robustness. For this, we clarify that  
14 testing for “unseen” cases means testing only within the developmental dataset, whereas testing for  
15 “ungaged” cases means testing for new sites that have not been previously seen by the model at all.  
16 Recent ML-SWT studies have only applied one or two of the tests, but not all three (Topp et al.,  
17 2023; Hani et al., 2023, Souassi et al., 2023). Siegel et al. (2023), a non-ML SWT paper, tested for  
18 ungaged and unseen data but did not perform a temporal test. A relatively new study, Philippus et al.  
19 (2024), appears to be the only published SWT-ML study that purposefully applied TUURTs with  
20 some success.  
21  
22

23 **2. Evaluation of Data Requirements:** The manuscript does not extensively discuss the challenges that  
24 ML ST modelers are facing with. Different ML models have varying data requirements, but the review  
25 does not thoroughly discuss the data needs for each type of model. For example, ML models are  
26 dependent on data. If we compare the availability of streamflow observation data availability versus the  
27 SWT observation data, we realize there is a massive gap here, which impacts the studies and reduces the  
28 SWT model performances. I suggest, while the authors encouraging the researchers and water institutes to  
29 collect more data, they add their comments on this issue and discuss how researchers can reduce the  
30 impact of this problem in their models.  
31

32 **AUTHOR RESPONSE:** We agree with the referee that issues remain with data requirement limitations.  
33 We propose adding a new ‘Discussion’ subsection, titled ‘ML Data Requirements vs. Availability’ stating  
34 the following:  
35

36 While, in recent years, access to hydrologic data has improved (Miller et al., 2022; CUAHSI,  
37 2024), data remains scarce in several hydrologic applications including SWT research, particularly  
38 because continual project management and funding to not only place but also maintain stream  
39 temperature sensors, can be expensive and/or time-consuming to undertake. As a result, in the 21<sup>st</sup>  
40 century, the scarcity of data remains a large impediment for the application of machine learning in  
41 SWT modeling. What is more, the question of data quantity (how much data do you have?) versus  
42 quality (how much diverse data is needed?) continues to hinder ML-use in hydrologic applications.  
43 Xu and Liang (2021) make the excellent point that one year of streamflow data (can swap for stream  
44 temperature) at 15-minute intervals equals about ~35,000 points, which may seem like a lot, but is  
45 unlikely to be enough to properly train a ML model due to autocorrelation and limited exposure to  
46 diverse types of data that are naturally encountered with a longer time-series (Xu and Liang, 2021).  
47 For example, machine learning models may only predict flood volumes they have previously seen  
48 (Kratzert et al., 2019). While data requirements for ML remain high, there are some strategies that  
49 researchers have used to alleviate the impact of this issue.

50 One strategy that hydrologists in other fields have used to tackle this problem is data  
51 augmentation, which can be applied spatially or temporally to create new training examples that the  
52 ML model can learn from. Spatial augmentation can be done by means of interpolation methods, i.e.,  
53 kriging or distance weighting to create new data points or by generating synthetic data based on

1 expected physical patterns to fill gaps in data coverage (Baydaroglu and Demir, 2024). Temporal data  
 2 augmentation can be done by shifting, scaling or adding noise to existing time series to create new  
 3 training examples for the model to consider (Skoulikaris et al., 2022). Alternatively, and not a new  
 4 idea, would be to use the statistical technique known as seasonal decomposition, which breaks down a  
 5 time series into its main components, i.e., the trend, seasonal patterns and residual components  
 6 (Apaydin et al., 2021; He et al., 2022). These can then be recombined to generate new data and train  
 7 the model for improved accuracy (Apaydin et al., 2021). In addition to data augmentations, data  
 8 requirements can be alleviated by considering the help of unsupervised transfer learning, i.e., use pre-  
 9 trained models on similar tasks to reduce amount of data needed for training, or semi-supervised  
 10 learning, such as few shot learning, i.e., combine a small percent of labeled data with larger percent of  
 11 unlabeled data to improve model performance (Yang et al., 2023). By implementing these strategies,  
 12 researchers in other hydrologic fields have shown that models can be improved with less data,  
 13 strategies that are likely transferable to SWT research.  
 14  
 15

16 **3. Future Directions Could Be Expanded:** Although the paper concludes with a general discussion of  
 17 future challenges, it does not offer specific, actionable directions for future research. Highlighting key  
 18 areas where ML can advance, such as the use of satellite data, sensor networks, or the fusion of climate  
 19 models with ML, would provide more meaningful insights. In this concept, we can learn from hydrologic  
 20 community and capitalize on their experience and what they learned. The ML hydrologic community is  
 21 moving toward making global models, incorporating mechanistic models into their ML framework and  
 22 learning the governing factors, flow prediction with predicted inputs (predicted meteorological inputs)  
 23 and last but not least, providing a seamless simulation in streams in CONUS/global scale. Therefore, I  
 24 would ask the authors to add their comments on where the future direction of SWT community should be  
 25 and how SWT community can achieve the future objectives and what the barriers are.  
 26

27 **AUTHOR RESPONSE:** We agree and appreciate the referee's feedback. We propose adding a new  
 28 'Discussion' subsection, titled '4.3 Future Directions of SWT Modeling', with the following:  
 29

30 The utility of ML in hydrologic modeling has come a long way, with interest seemingly growing  
 31 exponentially (Nearing et al., 2021). With the novelty of ML, it is easy to get lost in the value of how  
 32 well a model performs and ignore the science, but with several decades of ML-experience, we think it  
 33 necessary to urge the scientific community to purposefully use ML address physically-meaningful  
 34 questions and not just create ML for the sake of creating. Given this, Varadharajan et al. (2022) laid  
 35 out an excellent discussion on opportunities for advancement of ML in water quality modeling, see  
 36 section 3 of publication (Varadharajan et al., 2022). Here we highlight some of the questions from  
 37 Varadharajan et al. (2022) that can be considered in the context of what the objectives of the SWT  
 38 community should be in the ML era, namely: 1) How do we use physical knowledge (re: heat  
 39 exchange equations, radiation influence) to improve models and process understanding? Rahmani et  
 40 al. (2023) coupled NNs with the physical knowledge from SNTMP, a one-dimensional stream  
 41 temperature model that calculates the transfer of energy to or from a stream segment by either heat  
 42 flux equations or advection, but found that even with SNTMP, their flexible NNs exhibited  
 43 substantial variance in prediction and needed to be constrained by further multi-dimensional  
 44 assessments (Rahmani et al., 2023). In short, if our use of physics in machine learning makes our  
 45 models worse, we must know why.

46 A second question that needs addressing is 2) How do we deal with predictive uncertainty in ML  
 47 used for SWT modeling? According to Moriasi et al. (2007), uncertainty analysis is the process of  
 48 quantifying the level of confidence in any given model output based on five guidelines: 1) the quality  
 49 and amount of observations (data), 2) the lack of observations due to poor or limited field monitoring,  
 50 3) the lack of knowledge of physical processes or operational procedures (instrumentation), 4) the  
 51 approximation of our mathematical equations, and 5) the robustness of model sensitivity analysis and  
 52 calibration. For example, in rainfall-runoff modeling, researchers have proposed benchmarking to  
 53 examine uncertainty predictions of ML rainfall-runoff modeling (Klotz et al., 2022). For stream

1 temperature modeling, researchers have attempted to address the role of uncertainty in deep learning  
 2 model (RGCN, LSTM) prediction using the Monte Carlo Dropout (Zwart, Oliver, et al., 2023) and a  
 3 unimodal mixture density network approach (Zwart, Diaz, et al., 2023).

4 Other questions that SWT-ML studies should consider is 3) How do we make ML models  
 5 generalize better, specifically with regards to ungauged basins? And 4) How can ML models be  
 6 improved to predict extremes? As ML models advance to use satellite data, include more sensor  
 7 networks and/or couple with climate models, there is a logical next step toward creating generalizable  
 8 models that can account for extremes. In our review, only two papers by the same group (Rahmani et  
 9 al., 2020, 2023) conducted a CONUS-scale approach towards SWT-ML modeling, omitting  
 10 hydrologically important regions in the southwest (CA) and southeast (FL). Recently, a satellite  
 11 remote sensing paper used RF to model monthly stream temperature across the CONUS and tested for  
 12 temporal (walk-forward validation), unseen and ‘true’ ungauged regions (Philippus et al., 2024). We  
 13 have also learned that ML models such as LSTMs, generally only make predictions within the bounds  
 14 of their training data (Kratzert et al., 2019), which is a limitation for predicting extremes. Thus, we  
 15 strongly urge the community to work towards ML models that generalize better and/or are more  
 16 robust towards predictions of extremes.

17 Finally, 5) How can we build ML models such that they are seen as trustworthy and  
 18 interpretable by the hydrologic community? To answer this question, we must address a technical  
 19 barrier (black-box issues, data limitations, model uncertainty) and a social barrier (i.e., educated  
 20 skepticism of ML due to novelty, little understanding of computer science basics and/or coding  
 21 experience). If we are to incorporate ML into more of the decision-making process, it makes sense  
 22 that ML must be transparent and understandable to more than just computer scientists (Varadharajan  
 23 et al., 2022). For example, Topp et al. (2023) recently used explainable AI to elucidate how ML  
 24 architectures affected the SWT model’s spatial and temporal dependencies, and how that in turn  
 25 affected the model’s accuracy. Addressing this technical barrier can also be done by improving access  
 26 to data, which has seen remarkable progress thanks to web repositories such as NSF-funded  
 27 CUAHSI’s Hydro share (CUAHSI, 2024) and GitHub (GitHub, 2024). In the United States, data  
 28 access to state and locally-based data remains limited, and should be addressed. In terms of the social  
 29 barrier, education about ML and ML-use is key. Societal interest in ML has thankfully also lead to a  
 30 plethora of educational resources and ML walk-through videos and tutorials in Tensorflow (Abadi et  
 31 al., 2015), PyTorch (Abadi et al., 2015), and Google Colab (Bison, 2019). With how fast ML-use is  
 32 evolving, short communication pieces (Lapuschnik et al., 2019) and opinion pieces (Kratzert et al.,  
 33 2024) with clear examples about an ML-issue and practical solutions could also help make ML  
 34 challenges more transparent and therefore accessible to the hydrologic community-at-large.

### 35 **Added citations used for new subsection, 4.3 Future Directions of SWT Modeling:**

- 37 1) Apaydin, H., Taghi Sattari, M., Falsafian, K., and Prasad, R.: Artificial intelligence modelling integrated with  
 38 Singular Spectral analysis and Seasonal-Trend decomposition using Loess approaches for streamflow  
 39 predictions, *Journal of Hydrology*, 600, 126506, <https://doi.org/10.1016/j.jhydrol.2021.126506>, 2021.
- 40 2) Baydaroğlu, Ö. and Demir, I.: Temporal and spatial satellite data augmentation for deep learning-based rainfall  
 41 nowcasting, *Journal of Hydroinformatics*, 26, 589–607, <https://doi.org/10.2166/hydro.2024.235>, 2024.
- 42 3) CUAHSI. 2024. Consortium of Universities for the Advancement of Hydrologic Science, Inc. (CUAHSI) Water  
 43 Data Portal: <https://www.cuahsi.org/community/water-data-portals>, last access: 13 November 2024.
- 44 4) Kratzert, F., Gauch, M., Klotz, D. and Nearing, G., 2024. HESS Opinions: Never train an LSTM on a single  
 45 basin. *Hydrology and Earth System Sciences Discussions*, 2024, pp.1-19.
- 46 5) Kwak, J., St-Hilaire, A., and Chebana, F.: A comparative study for water temperature modelling in a small basin,  
 47 the Fourchue River, Quebec, Canada, *Hydrological Sciences Journal*, 1–12,  
 48 <https://doi.org/10.1080/02626667.2016.1174334>, 2016.
- 49 6) Philippus, D., Sytsma, A., Rust, A., and Hogue, T. S.: A machine learning model for estimating the temperature of  
 50 small rivers using satellite-based spatial data, *Remote Sensing of Environment*, 311, 114271,  
 51 <https://doi.org/10.1016/j.rse.2024.114271>, 2024.

- 1 7) Nearing, G. S., Kratzert, F., Sampson, A. K., Pelissier, C. S., Klotz, D., Frame, J. M., Prieto, C., and Gupta, H. V.:  
 2 What Role Does Hydrological Science Play in the Age of Machine Learning?, *Water Resources Research*, 57,  
 3 e2020WR028091, <https://doi.org/10.1029/2020WR028091>, 2021.
- 4 8) Skoulikaris, C., Venetsanou, P., Lazoglou, G., Anagnostopoulou, C., and Voudouris, K.: Spatio-Temporal  
 5 Interpolation and Bias Correction Ordering Analysis for Hydrological Simulations: An Assessment on a  
 6 Mountainous River Basin, *Water*, 14, 660, <https://doi.org/10.3390/w14040660>, 2022.
- 7 9) Srivastava, N., Hinton, G., Krizhevsky, A., Sutskever, I., and Salakhutdinov, R.: Dropout: A Simple Way to  
 8 Prevent Neural Networks from Overfitting, *Journal of Machine Learning Research*, 15, 30, 2014.
- 9 10) Yang, M., Yang, Q., Shao, J., Wang, G., and Zhang, W.: A new few-shot learning model for runoff prediction:  
 10 Demonstration in two data scarce regions, *Environmental Modelling & Software*, 162, 105659,  
 11 <https://doi.org/10.1016/j.envsoft.2023.105659>, 2023.
- 12 11) GitHub. 2024. About Git and Github: [https://docs.github.com/en/get-started/start-your-journey/about-github-](https://docs.github.com/en/get-started/start-your-journey/about-github-and-git)  
 13 [and-git](https://docs.github.com/en/get-started/start-your-journey/about-github-and-git), last access: 14 November 2024.
- 14 12) Lapuschkin, S., Wäldchen, S., Binder, A., Montavon, G., Samek, W. and Müller, K.R., 2019. Unmasking Clever  
 15 Hans predictors and assessing what machines really learn. *Nature communications*, 10(1), p.1096.
- 16 13) Zwart, J.A., Oliver, S.K., Watkins, W.D., Sadler, J.M., Appling, A.P., Corson-Dosch, H.R., Jia, X., Kumar, V. and  
 17 Read, J.S., 2023. Near-term forecasts of stream temperature using deep learning and data assimilation in support  
 18 of management decisions. *JAWRA Journal of the American Water Resources Association*, 59(2), pp.317-337.
- 19 14) Zwart, J.A., Diaz, J., Hamshaw, S., Oliver, S., Ross, J.C., Sleckman, M., Appling, A.P., Corson-Dosch, H., Jia,  
 20 X., Read, J. and Sadler, J., 2023. Evaluating deep learning architecture and data assimilation for improving  
 21 water temperature forecasts at unmonitored locations. *Frontiers in Water*, 5, p.1184992.
- 22 15) Klotz, D., Kratzert, F., Gauch, M., Keefe Sampson, A., Brandstetter, J., Klambauer, G., Hochreiter, S. and  
 23 Nearing, G., 2022. Uncertainty estimation with deep learning for rainfall–runoff modeling. *Hydrology and*  
 24 *Earth System Sciences*, 26(6), pp.1673-1693.
- 25 16) M. Abadi, A. Agarwal, P. Barham, E. Brevdo, Z. Chen, C. Citro, G. S. Corrado, A. Davis, J. Dean, M. Devin, S.  
 26 Ghemawat, I. Goodfellow, A. Harp, G. Irving, M. Isard, R. Jozefowicz, Y. Jia, L. Kaiser, M. Kudlur, J.  
 27 Levenberg, D. Mané, M. Schuster, R. Monga, S. Moore, D. Murray, C. Olah, J. Shlens, B. Steiner, I. Sutskever,  
 28 K. Talwar, P. Tucker, V. Vanhoucke, V. Vasudevan, F. Viégas, O. Vinyals, P. Warden, M. Wattenberg, M. Wicke,  
 29 Y. Yu, and X. Zheng. TensorFlow: Large-scale machine learning on heterogeneous systems. 2015. TensorFlow.  
 30 Website: <https://www.tensorflow.org/>
- 31 17) A. Paszke, S. Gross, F. Massa, A. Lerer, J. Bradbury, G. Chanan, T. Killeen, Z. Lin, N. Gimelshein, L. Antiga, A.  
 32 Desmaison, A. Köpf, E. Yang, Z. DeVito, M. Raison, A. Tejani, S. Chilamkurthy, B. Steiner, L. Fang, J. Bai, S.  
 33 Chintala. 2019. PyTorch: An Imperative Style, High-Performance Deep Learning Library. Website:  
 34 <https://arxiv.org/abs/1912.01703>
- 35 18) Bisong, E. (2019). Google Colaboratory. In: *Building Machine Learning and Deep Learning Models on Google*  
 36 *Cloud Platform*. Apress, Berkeley, CA. Website: [https://doi.org/10.1007/978-1-4842-4470-8\\_7](https://doi.org/10.1007/978-1-4842-4470-8_7)

37

38 4. The manuscript walked through many ML and AI models. An important factor of the ML and AI  
 39 models are the inputs. I assume you faced a variety of inputs that have been used in the models. That  
 40 would be informative to the readers, if the authors add their observations that what kind of inputs that  
 41 have been missed to be used, either because it is not available yet or it is even missed. For instance,  
 42 whether there is any geophysical attribute, climatic attributes, or any forcings that is worth to be extracted  
 43 and used in ML models.

44 **AUTHOR RESPONSE:** We appreciate the referee’s feedback. In the Supplementary Materials, Table S1  
 45 contains some of the suggested data by the referee, such as: period considered, region examined, temporal  
 46 resolution of SWT, spatial scale of study, and hydrometeorological parameters used for modeling. We  
 47 provided the information as Supplementary Material because Tables S1 and S2 are seven pages alone,  
 48 which may risk making the review lengthier than it already is. We have added text to the manuscript

1 regarding model inputs and moved the LASSO paragraph (original lines 247-253) to this section because  
2 we think it can more smoothly follow the paragraph on feature importance.

3  
4 This section will precede the “Local” and “Regional” subsections of 2.4 and be titled Model Inputs for  
5 ML-SWT:

6  
7 Using air temperature (AT) to better understand SWT has been considered since at least the  
8 1960s, when Ward (1963) and Edinger et al. (1968) discussed the influence of air temperature on  
9 SWT. Since then, studies have used varying input variables (see Table S1), however, the model inputs  
10 of AT and SWT continue to be the most used in ML-modeling studies. In particular, studies have  
11 used AT from time periods outside of the known SWT record to improve model performance (Sahoo  
12 et al., 2009; Piotrowski et al., 2015; Graf et al., 2019). In addition to AT and SWT, flow discharge has  
13 been used to attempt to constrain SWT (Foreman et al., 2001; Tao et al., 2008; St-Hilaire et al., 2011;  
14 Grbić et al., 2013; Piotrowski et al., 2015; Graf et al., 2019; Qiu et al., 2020). Traditionally-used  
15 model inputs include precipitation (Cole et al., 2014; Jeong et al., 2016; Rozos, 2023), wind  
16 direction/speed (Hong and Bhamidimarri, 2012; Cole et al., 2014; Jeong et al., 2016; Kwak et al.,  
17 2016; Temizyurek and Dadaser-Celik, 2018; Abdi et al., 2021; Jiang et al., 2022), barometric pressure  
18 (Cole et al., 2014), landform attributes (Risley et al., 2003; DeWeber and Wagner, 2014; Topp et al.,  
19 2023; Souaissi et al., 2023), and many more (see Table S1).

20 In the last few years, including the day-of-year as an input, DOY (Qiu et al., 2020; Heddam et  
21 al., 2022; Drainas et al., 2023; Rahmani et al., 2023) and humidity where available (Cole et al., 2014;  
22 Hong and Bhamidimarri, 2012; Kwak et al., 2016; Temizyurek and Dadaser-Celik, 2018; Abdi et al.,  
23 2021), have also shown to better capture the seasonal patterns of SWT (Qiu et al., 2020; Philippus et  
24 al., 2024). With improved access to remote sensing data, there has also been a notable increase of  
25 satellite products such as estimates of sky cover (Cole et al., 2014), solar radiation (Kwak et al., 2016;  
26 Topp et al., 2023; Majerska et al., 2024), sunshine per day (Drainas et al., 2023) and potential ET  
27 (Rozos, 2023; Topp et al., 2023). However, more research is needed to better understand the  
28 influence of newer model inputs on SWT (Zhu and Piotrowski, 2020).

29 Most recently, SWT studies focused on the CONUS-scale have chosen to use as many model  
30 inputs as available, with Wade et al. (2023), a point-scale CONUS ML study using over 20 variables,  
31 while Rahmani et al. (2023) created a LSTM model and considered over 30 variables to simulate  
32 SWT. Despite the use of diverse data, the models performed only satisfactorily and were deemed not  
33 generalizable, leaving much room for improvement in CONUS-scale modeling of SWT. With the  
34 compilation of larger and larger datasets, feature importance in ML, that is the process of using  
35 techniques to assign a score to model input features based on how good the features are at predicting  
36 a target variable, can be an efficient way to improve data comprehension, model performance, and  
37 model interpretability, the latter of which can dually serve as a transparency marker of which features  
38 are driving predictions. Methods for measuring feature importance include using correlation criteria  
39 (Pearson’s  $r$ , Spearman’s  $\rho$ ), permutation feature importance (shuffling feature values, measuring  
40 decrease in model performance), linear regression feature importance (larger absolute values indicate  
41 greater importance), or if using CART/RF/gradient boosting, entropy impurity measurements can be  
42 insightful (Venkateswarlu and Anmala, 2023).

43  
44 *Moved from section 2.3.1, original lines 246-253 to new section Model Inputs for ML-SWT:*

45 For example, one technique that can be used to improve ML model parameter selection is the  
46 *Least Absolute Shrinkage and Selection Operator (LASSO)*, a regression technique used for feature  
47 selection (Tibshirani, 1996). Research utilizing ML models for SWT frequency analysis at ungaged  
48 basins used the LASSO method to select explanatory variables for two ML models (Souaissi et al.,  
49 2023). The LASSO method consists of a shrinkage process where the method penalizes coefficients  
50 of regression variables by minimizing them to zero (Tibshirani, 1996). The number of coefficients set  
51 to zero depends on the adjustment parameter, which controls the severity of the penalty. Thus, the  
52 method can perform both feature selection and parameter estimation, an advantage when examining  
53 large datasets (Xu & Liang, 2021).

1 **5. Lack of Clear Structure in the Evaluation:** Although the paper aims to summarize the performance  
2 evaluation metrics for ML models in SWT prediction, the organization of these sections feels somewhat  
3 scattered. A more systematic approach could improve clarity, such as separating the analysis based on  
4 time scales (e.g., hourly, daily, monthly) or spatial scales (local, regional, continental). This would make  
5 it easier for readers to find the relevant insights based on their application. For instance, a stream  
6 temperature model in monthly scale is different from a daily or hourly scale models on many aspects. As  
7 an example, the complexity of a daily model is different from a monthly temperature models. A monthly  
8 model may not need all inputs of a daily model to capture the monthly changes. The authors can add their  
9 overall opinion of what types of models are better fitted to which time scale. In ML models, it is  
10 important to know the scope of the model, whether it is a local model that needs to be calibrated site by  
11 site, or it is a model that is designed to work for multiple sites (a regional model). I believe that would be  
12 informative to consider the modeling approach when methods are compared.

13  
14 **AUTHOR RESPONSE:** We appreciate the opportunity to clarify. Initially, we did create a performance  
15 metric comparison by spatial scale for the most-cited metric, RMSE (42 papers cited) and plotted RMSE  
16 by study for regional/CONUS scale and local scale (found in the HYDROSHARE repository but not in  
17 the manuscript), however we found minimal performance metric differences between the  
18 regional/CONUS studies and the local scale studies, which we state on Table 1 in the manuscript.

19  
20 One of the possible reasons why we found no differences is due to the inherent variability of each  
21 individual publication's goals and a self-limiting behavior where earlier studies published less data than  
22 later studies. Additionally, one of the challenges of performance metric choice in the hydrologic modeling  
23 community is that authors choose whatever performance metric they prefer with little regard to what  
24 everyone else is doing (though this is improving). This inconsistency in choice limits which performance  
25 metrics we can summarize for readers and makes for challenging cross-comparison. Given how fast ML  
26 is advancing and being applied for hydrologic applications, we do not believe it wise to opionate on  
27 which ML model is better or worse. We think the choice is in the reader's hands and comes down to what  
28 the research question/goal is, the time frame of the research project, and the author's own objectives. We  
29 think that what we have done instead, with summarizing publications (see Tables S1 and S2) and  
30 highlighting performance metrics, allows the reader to identify what has already been done in the ML-  
31 SWT field so that they can then make their own informed decisions about their research questions and  
32 methods. As part of the supplementary info, Tables S1 includes summarized information stating the time  
33 scale, spatial scale, region and time period considered of each study while Table S2 lists the data analysis  
34 techniques and/or ML algorithms used, as well as the training/validation/testing percentages/time periods  
35 as reported by the study.



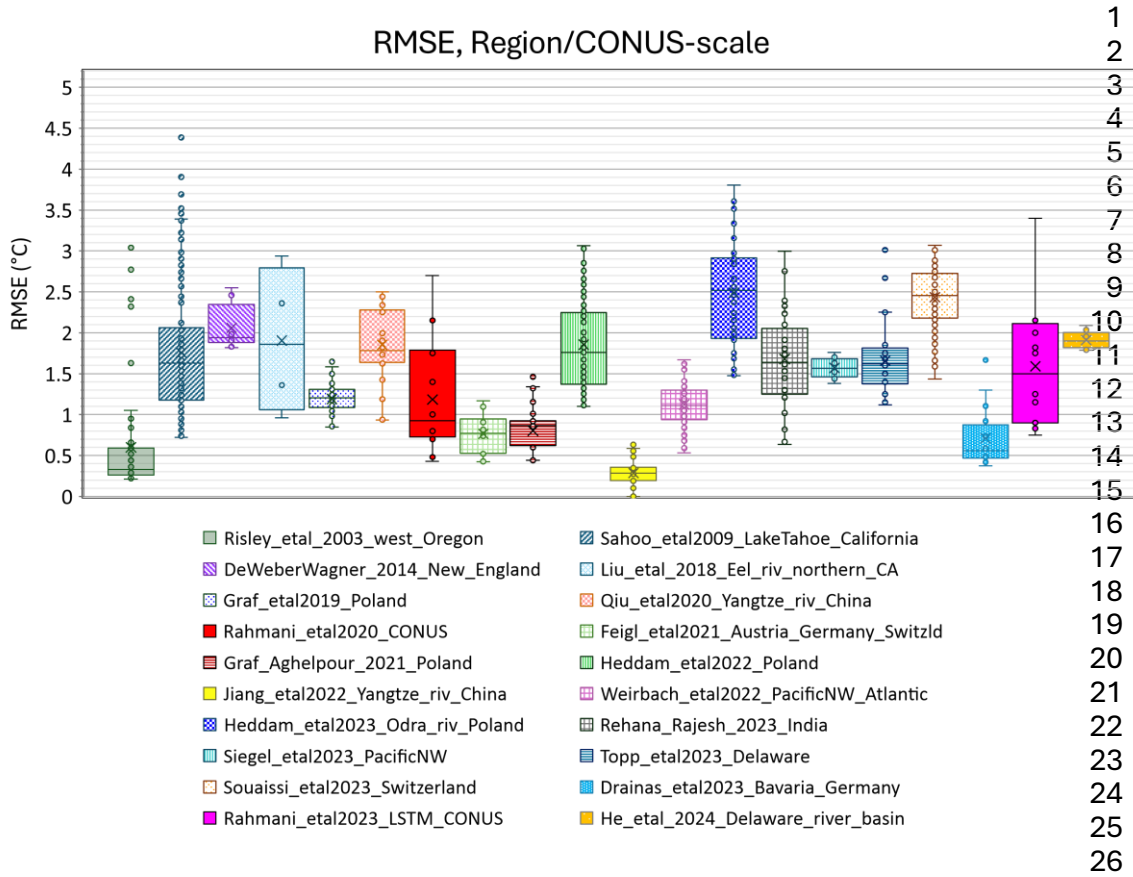

27

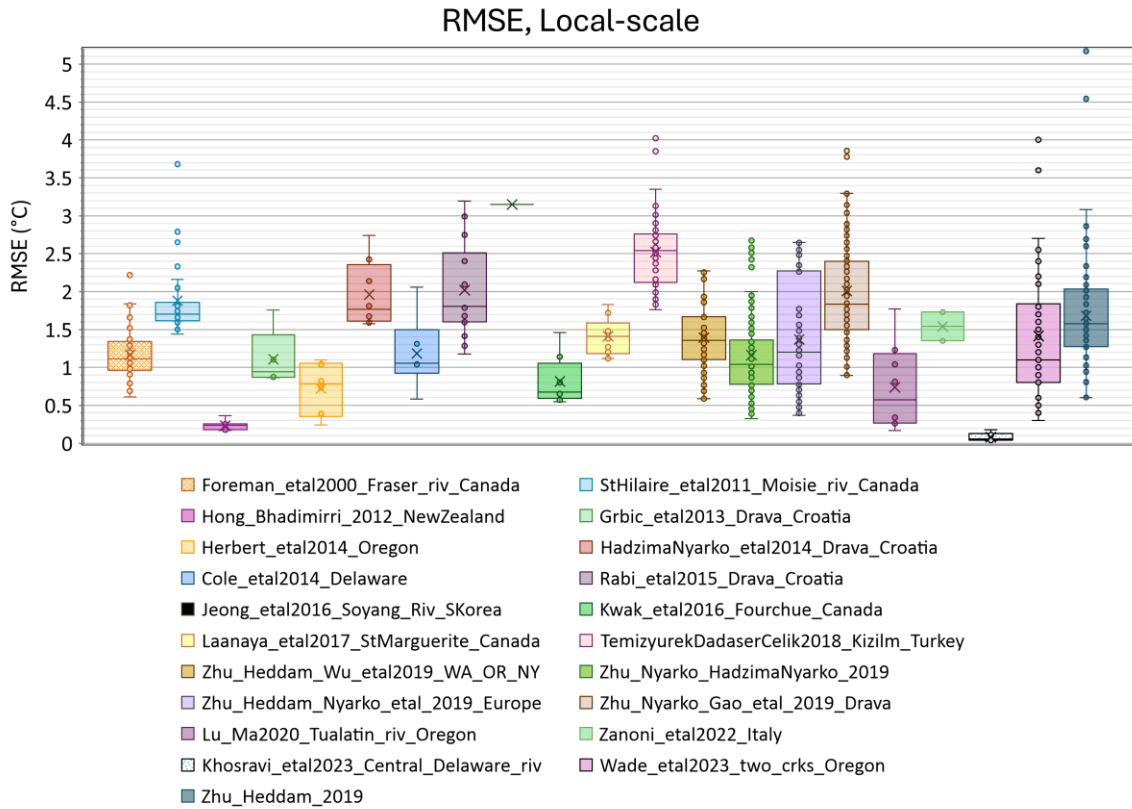

28  
29

6. The authors need to decide first who are the readers of the papers. Whether the paper serves to newcomers to ML and AI methodologies in stream temperature community or it serves to researchers that are already familiar with basics of ML and AI methods.

**AUTHOR RESPONSE:** We agree with the referee that the purpose of the review should be more clearly stated. We drafted this paper to serve as a middle ground between traditional modelers and more well-versed ML users. The intended audience are hydrologic modelers who have heard of AI/ML and want a summary of what has been done in SWT modeling using ML. Our dual objective is also for this to be a reference for what to expect from ML performance. At the same time, we want ML researchers to be aware of where their models stand compared to other modelers while communicating that an “A+ grade” is actually more common (and therefore the new average) relative to what they are used to in hydrologic modeling. We have added a few sentences in the introduction, under section 1.2 ‘Study Objectives’ of the manuscript to state who the intended audience is:

### 1.2. Study Objective (new in blue)

*The current work includes an extensive literature review of studies that used ML algorithms/models for river/SWT modeling, hindcasting and forecasting. The intent of this review is two-fold: 1) to introduce ML for hydrologists who have computer modeling experience and are interested in pursuing ML-use for their SWT studies, and 2) to provide a broad overview of machine learning applications in SWT. For ML experts, we think that this review could also prove useful as reference for how ML has been applied in the field of SWT modeling and where improvement is needed. Overall, this article aims to serve as a bridge between hydrologists and machine learning experts. Our review includes papers cited by Zhu and Piotrowski (2020), who previously conducted a study of ANNs used in SWT modeling, however, we provide a comprehensive examination of peer-reviewed journals that use any type of artificial intelligence/ML algorithm to model or evaluate river/SWT [...]*

**7a.** While the paper provides an extensive review of ML applications in SWT modeling, it focuses heavily on listing the types of ML models used rather than deeply analyzing their applications, strengths, weaknesses, and performance differences. A more critical analysis of the pros & cons of each model type could provide greater value to researchers choosing the appropriate model for their specific needs. To provide a few examples, I refer to lines 136 – 143 & lines 146 – 159 & lines 263 - 292.

**AUTHOR RESPONSE:** Thank you for the opportunity to clarify. We provided supplementary tables to summarize study information, for example, Tables S1 includes summarized information stating the time scale, spatial scale, region and time period considered of each study while Table S2 lists the data analysis techniques and/or ML algorithms used, as well as the training/validation/testing percentages/time periods as reported by the study. We think the “pros/cons” and “strengths/weakness” vary depending on the research goal and question, and the robustness of ML models allows them to cater to most problems, which is why we think instead of opinionating, it is better that we provide concrete specifications on the models used and allow the reader to decide based on their objectives.

**7b.** The first half of the paragraph that is written in lines 136 – 143 explains the fundamentals of the method, which may not be necessary to be long, and the rest is an example of the method usage. However, this paragraph could have been enriched by statements like the advantages and disadvantages of this method compared to other existing ML methods or even to a linear regression method, or a 1D mechanistic method (although they are not ML methods, but the comparison is beneficial to the readers). The authors also can add their statement of under what conditions they think the method is beneficial.

**AUTHOR RESPONSE:** We agree and show how we could edit the text to include describing the advantages and disadvantages of K-nn:

1  
2 K-nearest neighbors (K-nn) is a ~~type of~~ versatile supervised ML algorithm (Fix & Hodges, 1952;  
3 Cover & Hart, 1967) used to solve nonparametric classification and regression problems. ~~It is one of~~  
4 ~~the oldest algorithms (Fix & Hodges, 1952; Cover & Hart, 1967) considered within classical ML.~~ The  
5 K-nn algorithm uses proximity between data points to make classifications or evaluations about the  
6 grouping of any given data point (Acito, 2023). K-nn gained popularity in the 2010s due to its  
7 simplicity in implementation and understanding, making it accessible to hydrologic researchers and  
8 practitioners. ~~While less used today,~~ For example, St.-Hilaire et al. (20122011) used various K-nn  
9 model configurations to model SWT for the Moisie River in northern Quebec, Canada, ~~finding that~~  
10 ~~the best K-nn model required prior-day SWT data and day-of-year (DOY), an indicator of seasonality~~  
11 ~~(St. Hilaire et al., 2011).~~ Other advantages of K-nn include its non-assumptions of the underlying  
12 distribution of the data, allowing it to handle nonlinear complexities without requiring a solid model  
13 structure as is the case for some physical models (St-Hilaire et al., 2011). The disadvantages of K-nn  
14 are quite large however, as it has been found to be computationally intensive, requiring extensive  
15 cross-validation, is affected by irrelevant/redundant features that impact performance, and is  
16 impractical for large-scale applications (i.e., scalability issues), due to its high memory and  
17 computational requirements (Acito, 2023). For example, Heddam et al. (2022) ~~For five stream~~  
18 ~~stations in Poland, Heddam et al. (2022) compared K-nn with other ML algorithms, finding that K-nn~~  
19 ~~was outperformed by other MLs such as least squares support vector machine and neural networks.~~  
20 ~~performed poorly compared to other ML algorithms.~~ The use of K-nn may still be apt for simple,  
21 local cases but we advise considering other MLs for more complex or larger-use cases due to the  
22 aforementioned.

23  
24  
25 **7c. Lines 146 – 153** explains PCA & ck-means clustering on data reduction application, however, it is not  
26 clear under what conditions we can use them.

27  
28 **AUTHOR RESPONSE:** We agree. We propose adding text to clarify:

29  
30 Krishnaraj and Deka (2020) used *K-means* to organize spatial grouping for water quality monitoring  
31 stations for dry and wet regions along the Ganga River basin in India to identify whether pollution  
32 patterns could be discerned.

33  
34 Using *PCA*, Krishnaraj and Deka (2020) found that certain water quality parameters (dissolved  
35 oxygen, sulfate, electrical conductivity) were more dominant in the dry season compared to the wet  
36 season (total dissolved solids, sodium, potassium, sodium, chlorine, chemical oxygen demand), data  
37 which could be used to cater the monitoring program to the important parameters. In their study,  
38 SWT was not a dominant parameter, likely in part because the SWT of large downstream rivers like  
39 the Ganga River are generally less variable due to their larger volume and stronger thermal buffer.  
40 ~~Used k-means and PCA in the Ganga River Basin of India to find spatiotemporal patterns of water~~  
41 ~~quality parameters, including SWT.~~

42  
43  
44 **7d.** Additionally, that would be nice for readers if the authors add feature importance to their comparison  
45 as it has been used more frequently in streamflow and soil moisture prediction studies.

46  
47 **AUTHOR RESPONSE:** We agree and added text on feature importance to a section on model inputs as  
48 suggested (please see comment #4 for full text). The text specific to feature importance is below:

49  
50 Most recently, SWT studies focused on the CONUS-scale have chosen to use as many model  
51 inputs as available, with Wade et al. (2023), a point-scale CONUS ML study using over 20 variables,  
52 while Rahmani et al. (2023) created a LSTM model and considered over 30 variables to simulate  
53 SWT. Despite the use of diverse data, the models performed only satisfactorily and were deemed not

1 generalizable, leaving much room for improvement in CONUS-scale modeling of SWT. With the  
 2 compilation of larger and larger datasets, feature importance in ML, that is the process of using  
 3 techniques to assign a score to model input features based on how good the features are at predicting  
 4 a target variable, can be an efficient way to improve data comprehension, model performance, and  
 5 model interpretability, the latter of which can dually serve as a transparency marker of which features  
 6 are driving predictions. Methods for measuring feature importance include using correlation criteria  
 7 (Pearson's  $r$ , Spearman's  $\rho$ ), permutation feature importance (shuffling feature values, measuring  
 8 decrease in model performance), linear regression feature importance (larger absolute values indicate  
 9 greater importance), or if using CART/RF/gradient boosting, entropy impurity measurements can be  
 10 insightful (Venkateswarlu and Anmala, 2023).

11  
 12  
 13 **7e.** Lines 263 – 292 are organized in three paragraphs while providing general knowledge about ANNs  
 14 with relatively less direct relations to water temperature application.

15  
 16 **AUTHOR RESPONSE:** We appreciate the reviewer's feedback and are open to making changes to  
 17 improve the manuscript for the reader. Referee #3 made a similar comment about this section, and we  
 18 now wonder if it would be better to provide the description of ANN variants and alternatives (lines 263-  
 19 320) as part of an appendix. We think it would still be helpful to keep the information, but we also agree  
 20 that it may be too extensive for the main text. In this way, the manuscript can be made more concise while  
 21 also keeping the details as a section of the manuscript for anyone who is interested in reading further.

22  
 23 Following this line of thinking, we can add the following to point the reader to the appendix:

24  
 25 “For more detail on traditional ANNs, with descriptions of ANN variants and backpropagation  
 26 alternatives, we refer the reader to appendix A.”

27  
 28  
 29 **Minor corrections:**

- 30  
 31 1. Line 13: There is a typo that changes the meaning of the sentence. It should be “... with in situ ...” or  
 32 “... with in-situ ...”.

33  
 34 **AUTHOR RESPONSE:** Thank you for pointing this out, we have fixed the typo to read “with in-situ”.

- 35  
 36  
 37 2. Line 132: There is a typo here too. It should be “long short-term memory”. Although I am trying to  
 38 catch them, there is a chance that I miss some of them. I recommend the authors to carefully re-read  
 39 the manuscript or ask help from a fresh pair of eyes to find these types of typos.

40  
 41 **AUTHOR RESPONSE:** Thank you! We have revised the text to read “long short-term memory” and  
 42 reviewed the text accordingly.

- 43  
 44  
 45 3. Lines 208 – 210: to make the sentence more accurate, it needs to be stated whether these are local  
 46 models or one model for multiple sites. Additionally, I believe by “NNs” here, the authors mean  
 47 feedforward neural network, which are totally different from recurrent neural networks.

48  
 49 **AUTHOR RESPONSE:** Yes, we agree with both points. We have clarified that a feed-forward NN was  
 50 used and revised the sentence to make it more accurate:

51  
 52  
 53 ~~In the case of~~ A SWT modeling study comparing the output of three model versions of DT, GPR, and

1 feed-forward neural networks for daily SWT modeling multiple sites and prediction, found that DTs  
2 can could perform similarly to GPR and feed-forward neural networks when detailed statistics of air  
3 temperature, day-of-year, and discharge were included NNs (Zhu, Nyarko, Hadzima-Nyarko, Heddam,  
4 et al., 2019).

5  
6  
7 4. Line 541: “at” is missed. It is .. All journals examined used at least ...”

8  
9 **AUTHOR RESPONSE:** Thank you! We have added the word “at”.

10
